# Supplementary material for: Influence of work hours and commute time on food practices: a longitudinal analysis of the Household, Income and Labour Dynamics in Australia Survey
Source: HighWire-hosted journal article supplement (doi:10.1136/bmjopen-2021-056212), 2022-05-01
Supplement: bmjopen-2021-056212supp001_data_supplement.pdf [file bmjopen-2021-056212supp001_data_supplement.pdf]

## Supplementary file 1: Outcomes, exposures, and confounders

| Variable                               | Questions in HILDA[1]                                                                                                                                                                                                                                                                                                                                                                                                                                          | Categories in HILDA[1]                                                                                                                                                                        | Our derivation process                                                                                                                                                                                  | Final response options                                          |
|----------------------------------------|----------------------------------------------------------------------------------------------------------------------------------------------------------------------------------------------------------------------------------------------------------------------------------------------------------------------------------------------------------------------------------------------------------------------------------------------------------------|-----------------------------------------------------------------------------------------------------------------------------------------------------------------------------------------------|---------------------------------------------------------------------------------------------------------------------------------------------------------------------------------------------------------|-----------------------------------------------------------------|
| <b>Breakfast</b>                       | <i>How often in a usual week do you buy breakfast from a restaurant, café, fast food outlet, or any other place that prepares and sells meals?</i>                                                                                                                                                                                                                                                                                                             | 0-7 (times/week)                                                                                                                                                                              | N/A                                                                                                                                                                                                     | 0-7 (times/week)                                                |
| <b>Lunch</b>                           | <i>And how often do you buy lunch?</i>                                                                                                                                                                                                                                                                                                                                                                                                                         | 0-7 (times/week)                                                                                                                                                                              | N/A                                                                                                                                                                                                     | 0-7 (times/week)                                                |
| <b>Dinner</b>                          | <i>And how often do you buy dinner (i.e., the evening meal)?</i><br><i>'Meals' mean more than a beverage or a snack food (like a chocolate bar).</i>                                                                                                                                                                                                                                                                                                           | 0-7 (times/week)                                                                                                                                                                              | N/A                                                                                                                                                                                                     | 0-7 (times/week)                                                |
| <b>Total food out</b>                  | N/A                                                                                                                                                                                                                                                                                                                                                                                                                                                            | N/A                                                                                                                                                                                           | All three eating occasions were summed.                                                                                                                                                                 | 0-21 (times/week)                                               |
| <b>Fruit</b>                           | <i>Including tinned, frozen, dried and fresh fruit, on how many days in a usual week do you eat fruit?"</i><br><br>Respondents who had positive frequencies were asked to quantify their intake.<br><br><i>On a day when you eat fruit, how many serves of fruit do you usually eat? (As a rough guide, one serve is equal to one medium sized piece of fruit or two small pieces of fruit or one cup of diced fruit pieces.)</i>                              | 0 ("Do not eat fruit in a usual week")<br>1-7 (days/week)<br><br>"1" to "6 or more" serves.                                                                                                   | "Six or more" was treated as a numeric value of six. Frequencies and quantities were multiplied to calculate total weekly intake and then divided by 7 to reflect average daily intake of fruit. *      | 0-6 (serves/day)                                                |
| <b>Vegetables</b>                      | <i>Including tinned, frozen and fresh vegetables, on how many days in a usual week do you eat vegetables? Please do not include chips or French fries.</i><br><br>Respondents who had positive frequencies were asked to quantify their intake.<br><br><i>On a day when you eat vegetables, how many serves of vegetables do you usually eat? As a rough guide, one serve is equal to a half a cup of cooked vegetables (or one cup of salad vegetables)."</i> | 0 ("Do not eat vegetables in a usual week") to 7 (days/week)<br><br>"1" to "6 or more" serves.                                                                                                | "Six or more" was treated as a numeric value of six. Frequencies and quantities were multiplied to calculate total weekly intake and then divided by 7 to reflect average daily intake of vegetables. * | 0-6 (serves/day)                                                |
| <b>Work hours</b>                      | <i>How much time would you spend on each of the following activities in a typical week?</i><br><i>A. Paid employment.</i>                                                                                                                                                                                                                                                                                                                                      | Hours/week                                                                                                                                                                                    | N/A                                                                                                                                                                                                     | Hours/week                                                      |
| <b>Commute hours</b>                   | <i>How much time would you spend on each of the following activities in a typical week?</i><br><i>B. Travelling to and from a place of paid employment."</i>                                                                                                                                                                                                                                                                                                   | Hours/week                                                                                                                                                                                    | N/A                                                                                                                                                                                                     | Hours/week                                                      |
| <b>Combined work and commute hours</b> | N/A                                                                                                                                                                                                                                                                                                                                                                                                                                                            | N/A                                                                                                                                                                                           | Both work hours and commute time were summed.                                                                                                                                                           | Hours/week                                                      |
| <b>Age</b>                             | Age at last birthday as of 30 June immediately preceding the fieldwork for that wave                                                                                                                                                                                                                                                                                                                                                                           | Years                                                                                                                                                                                         | N/A                                                                                                                                                                                                     | Years                                                           |
| <b>Sex</b>                             | Sex                                                                                                                                                                                                                                                                                                                                                                                                                                                            | Male<br>Female                                                                                                                                                                                | N/A                                                                                                                                                                                                     | Male<br>Female                                                  |
| <b>Education</b>                       | Derived from multiple questions relating to qualifications                                                                                                                                                                                                                                                                                                                                                                                                     | 1 "Postgrad, masters or doctorate"<br>2 "Grad diploma, grad certificate"<br>3 "Bachelor or honours"<br>4 "Adv diploma, diploma"<br>5 "Cert III or IV"<br>8 "Year 12"<br>9 "Year 11 and below" | A new variable "No tertiary education" was derived combining categories 4, 5, 8, and 9 in HILDA, and "Tertiary education" was derived combining categories 1 to 3 in HILDA.                             | No tertiary education<br>Tertiary education                     |
| <b>Household composition</b>           | Counts of the number of persons in the household in various age groups. The ages are calculated as at June 30 of the interview year                                                                                                                                                                                                                                                                                                                            | Count                                                                                                                                                                                         | Combinations were created using the number of persons aged over 12 years at June 30 and the number of                                                                                                   | Single person: One person aged >15 years, no children <15 years |

|                                            |                                                                                                                                                                                                                                                                                        |                                                                                                                                                                                                                                                       |                                                                                                                                                |                                                                                                                                                                                                                                                                          |
|--------------------------------------------|----------------------------------------------------------------------------------------------------------------------------------------------------------------------------------------------------------------------------------------------------------------------------------------|-------------------------------------------------------------------------------------------------------------------------------------------------------------------------------------------------------------------------------------------------------|------------------------------------------------------------------------------------------------------------------------------------------------|--------------------------------------------------------------------------------------------------------------------------------------------------------------------------------------------------------------------------------------------------------------------------|
|                                            |                                                                                                                                                                                                                                                                                        |                                                                                                                                                                                                                                                       | persons aged 0-14 years in the household.                                                                                                      | Single parent: One person aged >15 years, at least one child <15 years<br><br>Multi-person without children: Two or more people aged >15 years, no children <15 years<br><br>Multi-person with children: Two or more people aged >15 years, at least one child <15 years |
| <b>Remoteness area</b>                     | Derived from household information                                                                                                                                                                                                                                                     | 0 Major Cities of Australia<br>1 Inner Regional Australia<br>2 Outer Regional Australia<br>3 Remote Australia<br>4 Very Remote Australia                                                                                                              | Most categories were kept as is, only categories 3 and 4 were combined due to low cell counts/numbers of participants residing in these areas. | Major Cities of Australia<br>Inner Regional Australia<br>Outer Regional Australia<br>Remote Australia or Very Remote Australia                                                                                                                                           |
| <b>Neighbourhood socio-economic status</b> | Derived from household information<br><br>SEIFA: Decile of Index of Advantage/Disadvantage this index is a continuum of advantage to disadvantage, looks at proportion of families with high incomes, people with a tertiary education, and people employed in a skilled occupation[2] | 1 Lowest decile<br>2 2nd decile<br>3 3rd decile<br>...<br>9 9th decile<br>10 Highest decile                                                                                                                                                           | N/A                                                                                                                                            | 1 Lowest decile<br>2 2nd decile<br>3 3rd decile<br>...<br>9 9th decile<br>10 Highest decile                                                                                                                                                                              |
| <b>Work schedule</b>                       | <i>Which of these best describes your current work schedule in your (main) job?</i>                                                                                                                                                                                                    | 1 A regular daytime schedule<br>2 A regular evening shift<br>3 A regular night shift<br>4 A rotating shift (changes from days to evenings to nights)<br>5 Split shift (two distinct periods each day)<br>6 On call<br>7 Irregular schedule<br>8 Other | All categories from 2 to 8 were combined, capturing a schedule different from a regular daytime (category 1)                                   | 1 A regular daytime schedule<br>2 Other                                                                                                                                                                                                                                  |

N/A: not applicable; \*A similar approach has been used in previous research using HILDA data[3].

## References

- 1 Summerfield M, Bright S, Hahn M, *et al.* HILDA User Manual – Release 18. Melbourne: Melbourne Institute: Applied Economic and Social Research, University of Melbourne 2019.
- 2 Australian Bureau of Statistics. Socio-Economic Indexes for Areas. 2018.
- 3 Mujcic R, J.Oswald A. Evolution of Well-Being and Happiness After Increases in Consumption of Fruit and Vegetables. *Am J Public Health* 2016;**106**:1504-10.
