# Supplementary material for: Influence of work hours and commute time on food practices: a longitudinal analysis of the Household, Income and Labour Dynamics in Australia Survey
Source: HighWire-hosted journal article supplement (doi:10.1136/bmjopen-2021-056212), 2022-05-01
Supplement: bmjopen-2021-056212supp002_data_supplement.pdf [file bmjopen-2021-056212supp002_data_supplement.pdf]

**Supplementary file 2:** Sample size per analysis

|                       | <b>Work hours</b> | <b>Commute hours</b> | <b>Combined</b> |
|-----------------------|-------------------|----------------------|-----------------|
|                       | Ind. (obs.)       | Ind. (obs.)          | Ind. (obs.)     |
| <b>Breakfast</b>      | 14,512 (31,798)   | 14,360 (31,202)      | 14,359 (31,159) |
| <b>Lunch</b>          | 14,510 (31,798)   | 14,358 (31,201)      | 14,357 (31,158) |
| <b>Dinner</b>         | 14,510 (31,797)   | 14,358 (31,200)      | 14,357 (31,157) |
| <b>Total food out</b> | 14,509 (31,792)   | 14,357 (31,196)      | 14,356 (31,153) |
| <b>Fruit</b>          | 14,510 (31,795)   | 14,359 (31,199)      | 14,358 (31,156) |
| <b>Vegetables</b>     | 14,510 (31,795)   | 14,358 (31,198)      | 14,357 (31,155) |

Note: In Stata, Poisson fixed effects models drop those with only one observation and those with all zero outcomes because these observations do not contribute to the likelihood function. Ind. = number of individuals; obs. = number of observations.
