# Supplementary material for: Influence of work hours and commute time on food practices: a longitudinal analysis of the Household, Income and Labour Dynamics in Australia Survey
Source: HighWire-hosted journal article supplement (doi:10.1136/bmjopen-2021-056212), 2022-05-01
Supplement: bmjopen-2021-056212supp003_data_supplement.pdf [file bmjopen-2021-056212supp003_data_supplement.pdf]

**Supplementary file 3:** Histograms of the variations within individuals for the exposure and outcomes variables

## Individual variation in work hours across waves

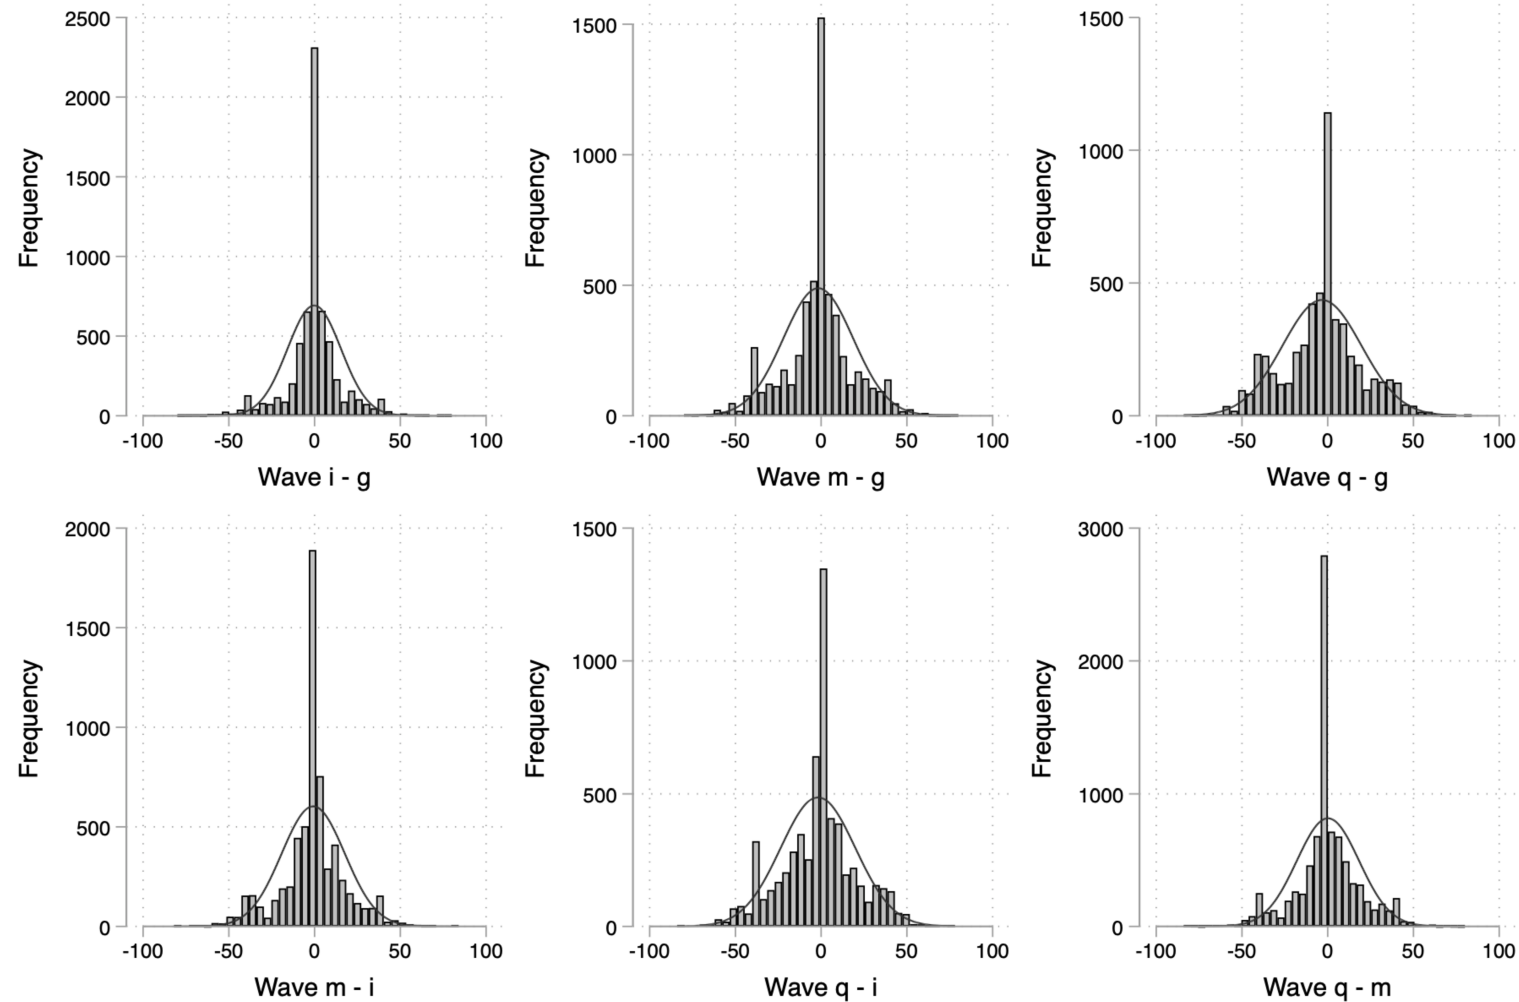

Note: Names of the waves correspond to the waves in the original HILDA dataset. Wave i is wave 1 in the current study. Wave g is wave 2 in the current study. Wave m is wave 3 in the current study. Wave q is wave 4 in the current study.

## Individual variation in commute hours across waves

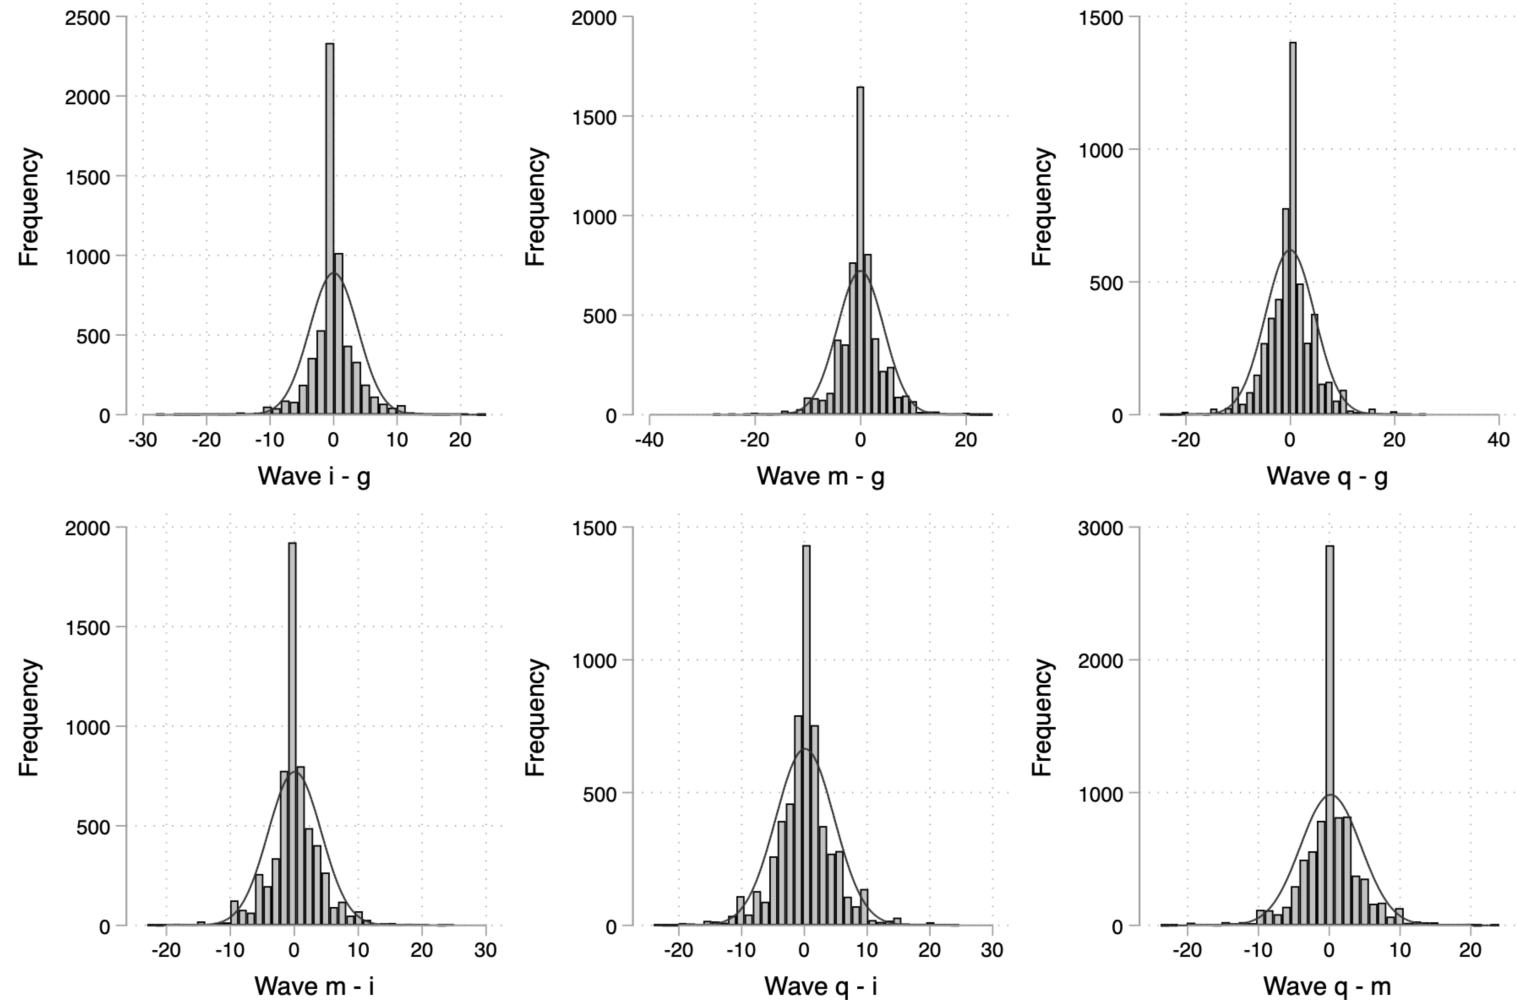

Note: Names of the waves correspond to the waves in the original HILDA dataset. Wave i is wave 1 in the current study. Wave g is wave 2 in the current study. Wave m is wave 3 in the current study. Wave q is wave 4 in the current study.

## Individual variation in work and commute hours across waves

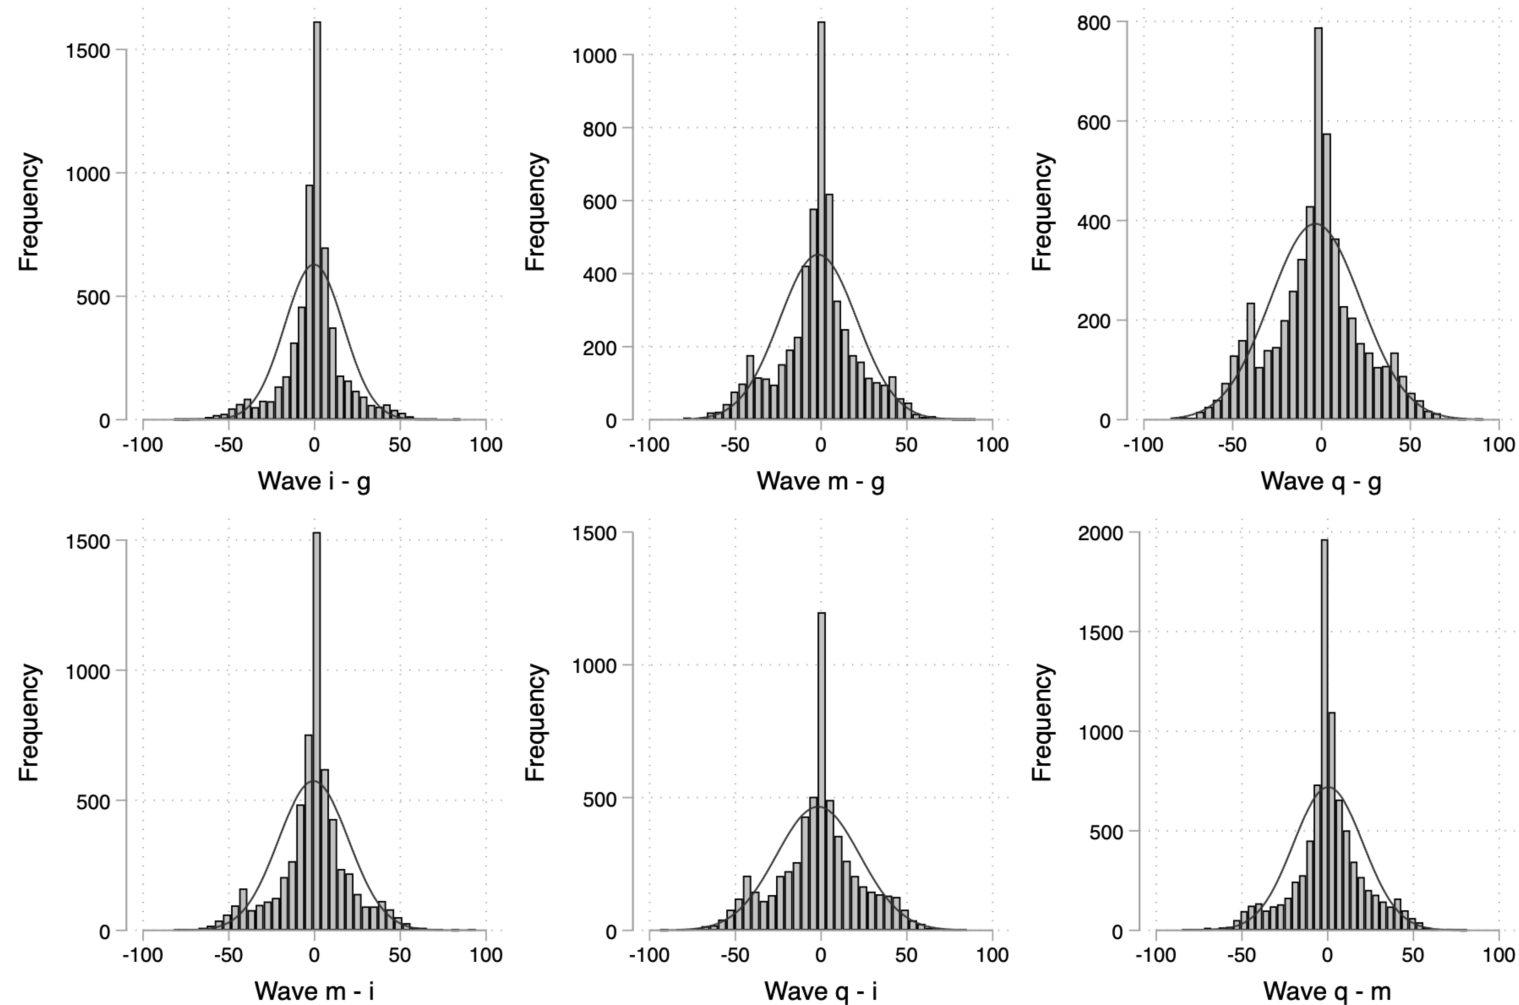

Note: Names of the waves correspond to the waves in the original HILDA dataset. Wave i is wave 1 in the current study. Wave g is wave 2 in the current study. Wave m is wave 3 in the current study. Wave q is wave 4 in the current study.

## Individual variation in breakfast across waves

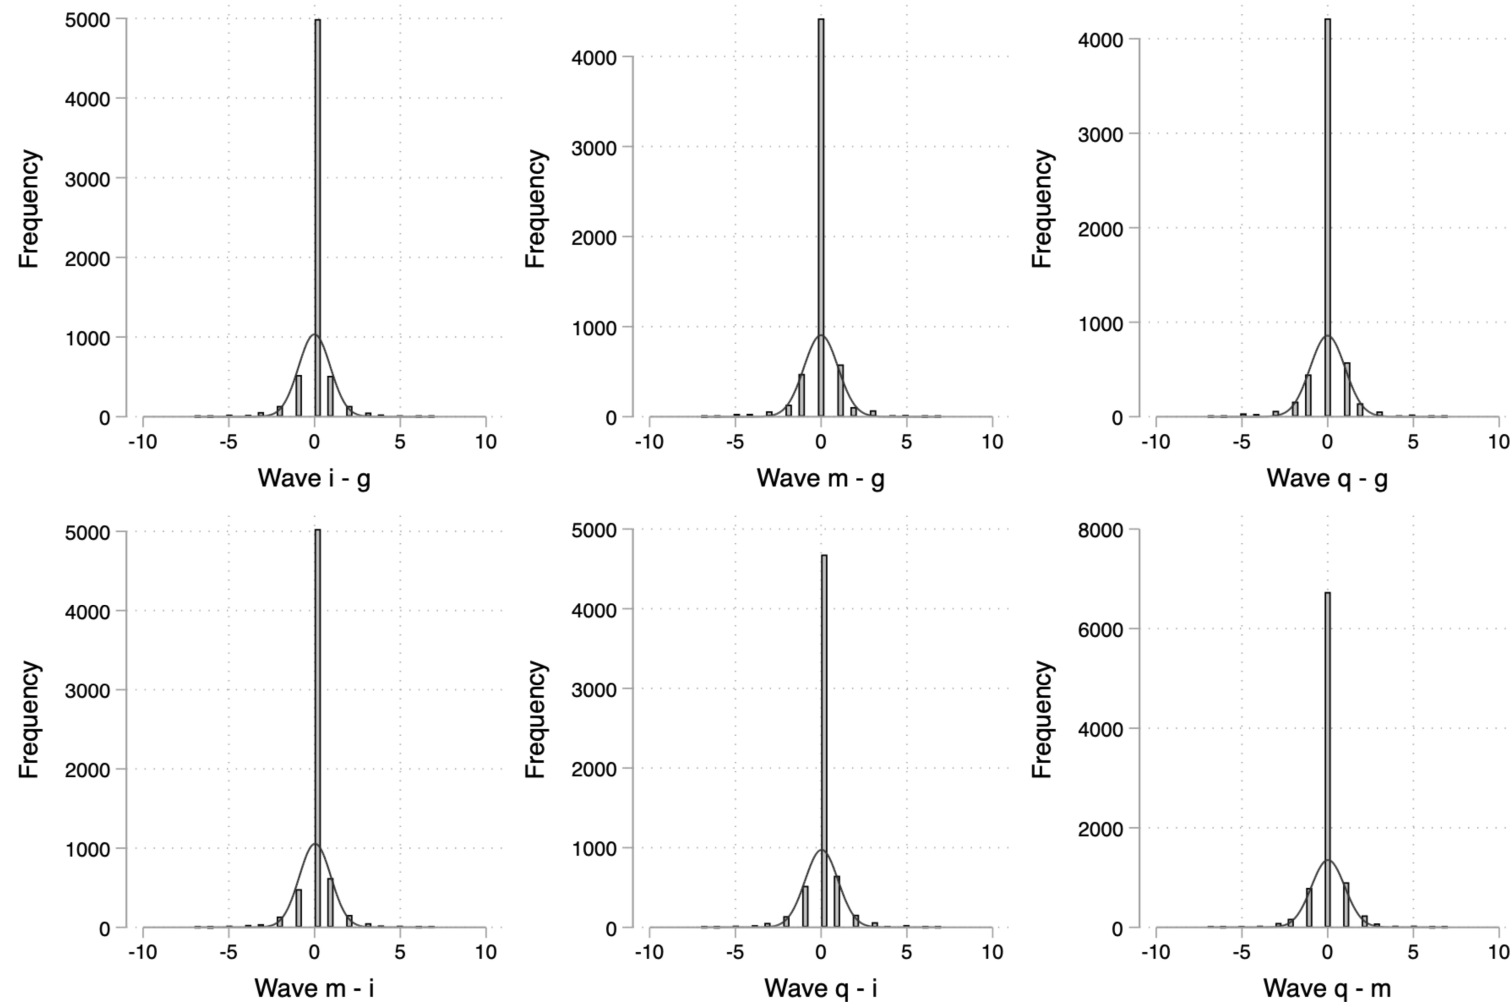

Note: Names of the waves correspond to the waves in the original HILDA dataset. Wave i is wave 1 in the current study. Wave g is wave 2 in the current study. Wave m is wave 3 in the current study. Wave q is wave 4 in the current study.

## Individual variation in lunch across waves

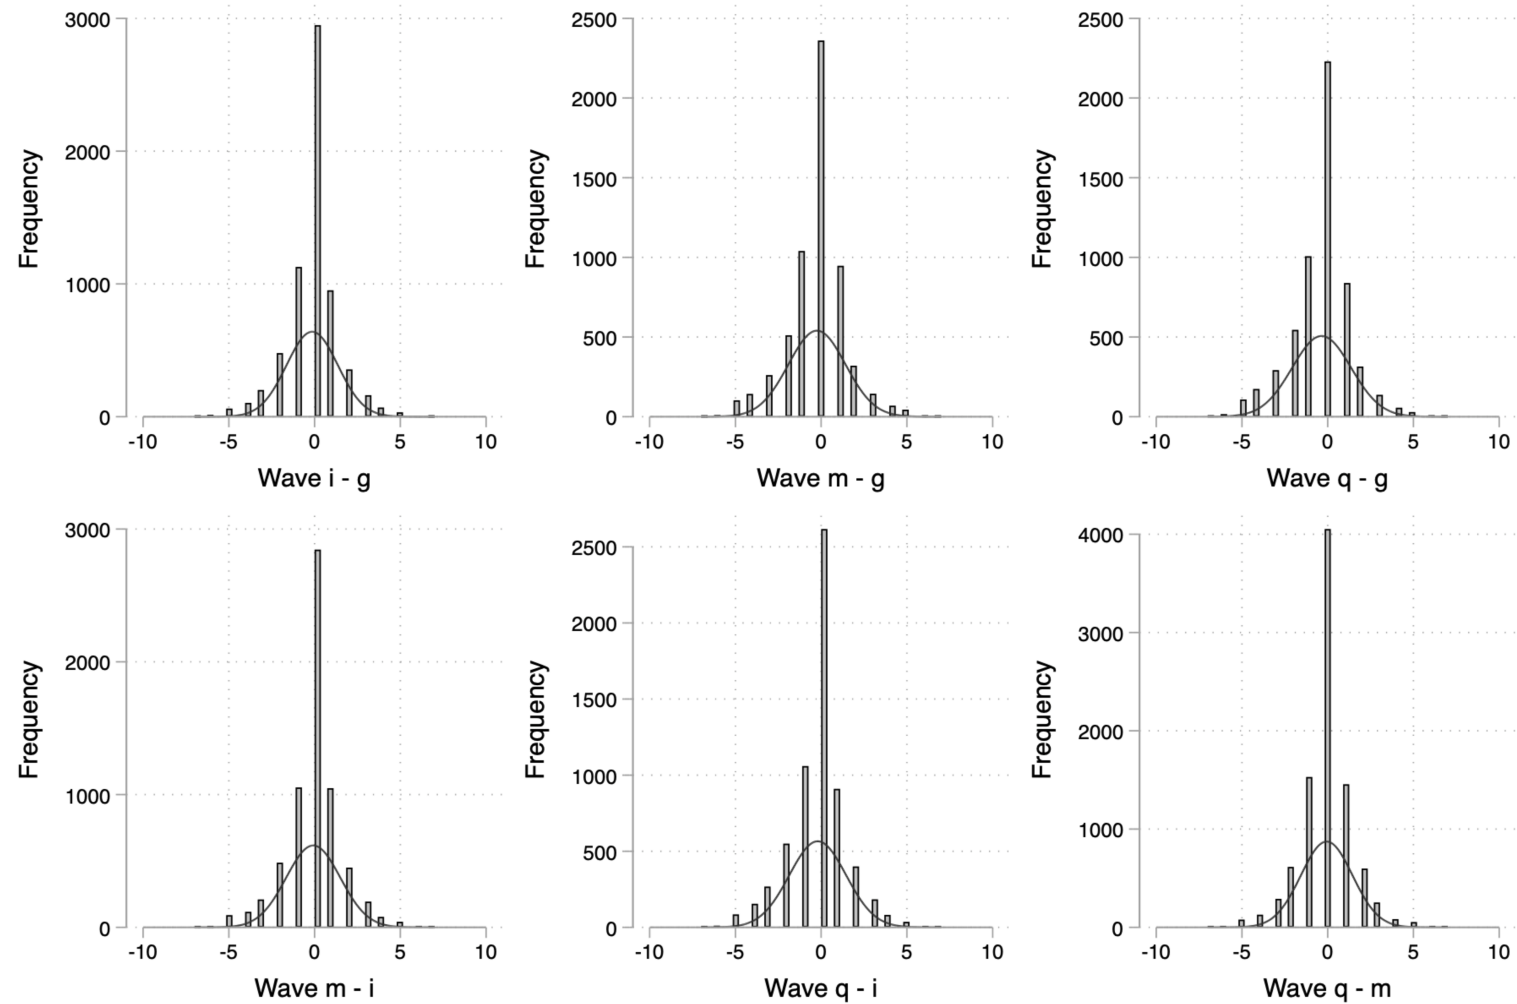

Note: Names of the waves correspond to the waves in the original HILDA dataset. Wave i is wave 1 in the current study. Wave g is wave 2 in the current study. Wave m is wave 3 in the current study. Wave q is wave 4 in the current study.

## Individual variation in dinner across waves

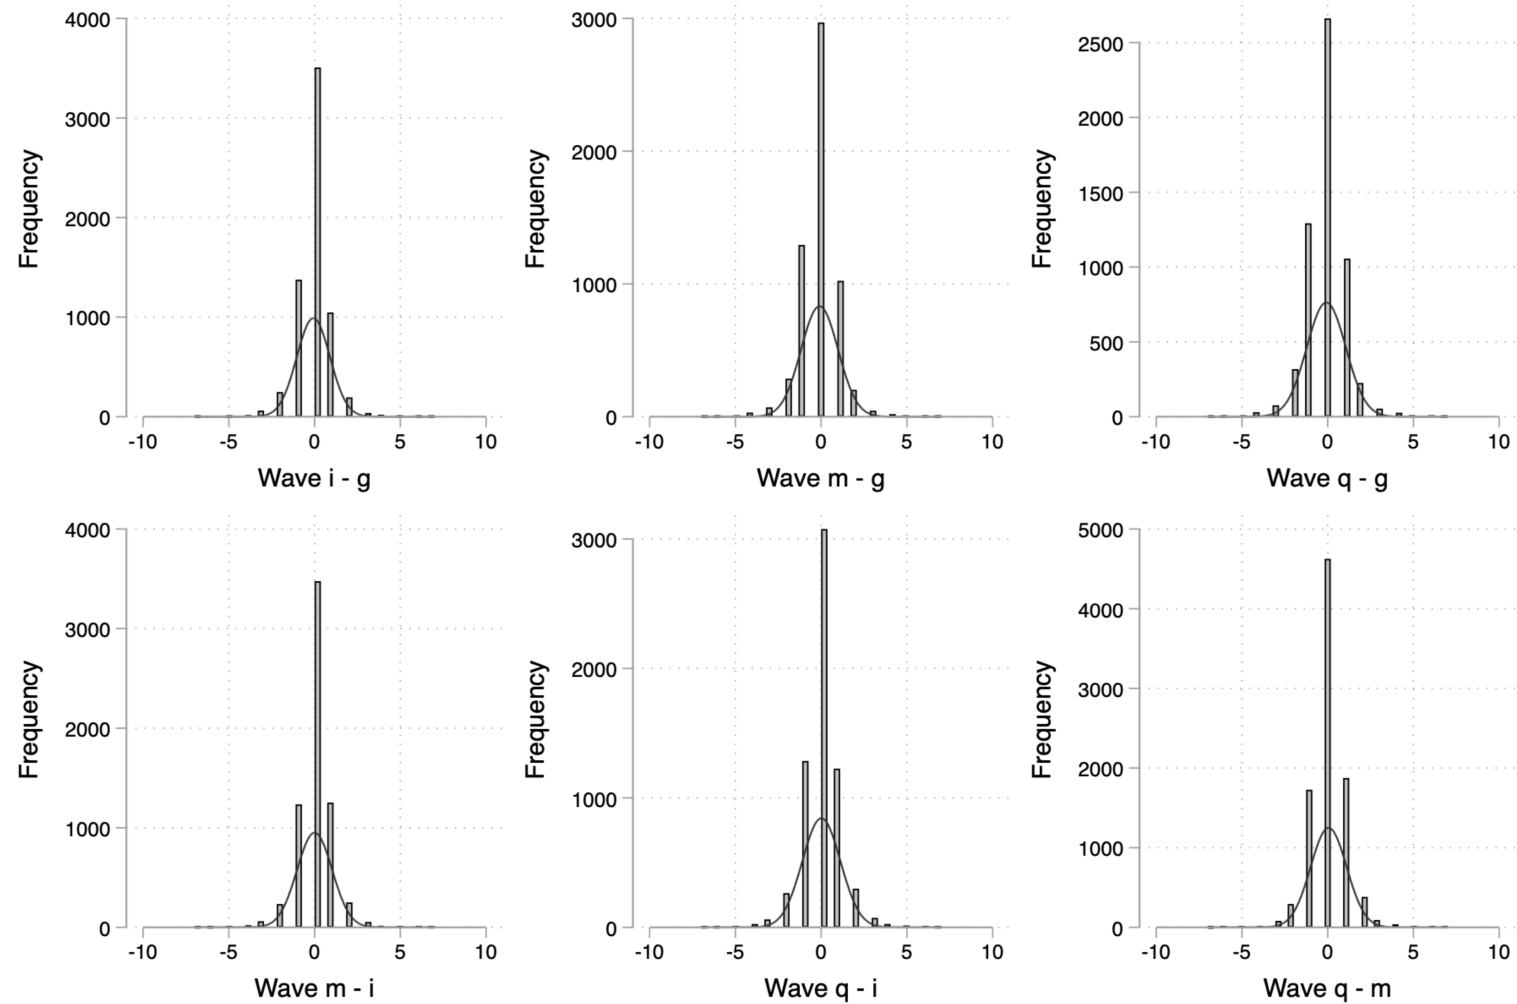

Note:

Names of the waves correspond to the waves in the original HILDA dataset. Wave i is wave 1 in the current study. Wave g is wave 2 in the current study. Wave m is wave 3 in the current study. Wave q is wave 4 in the current study.

## Individual variation in total food out across waves

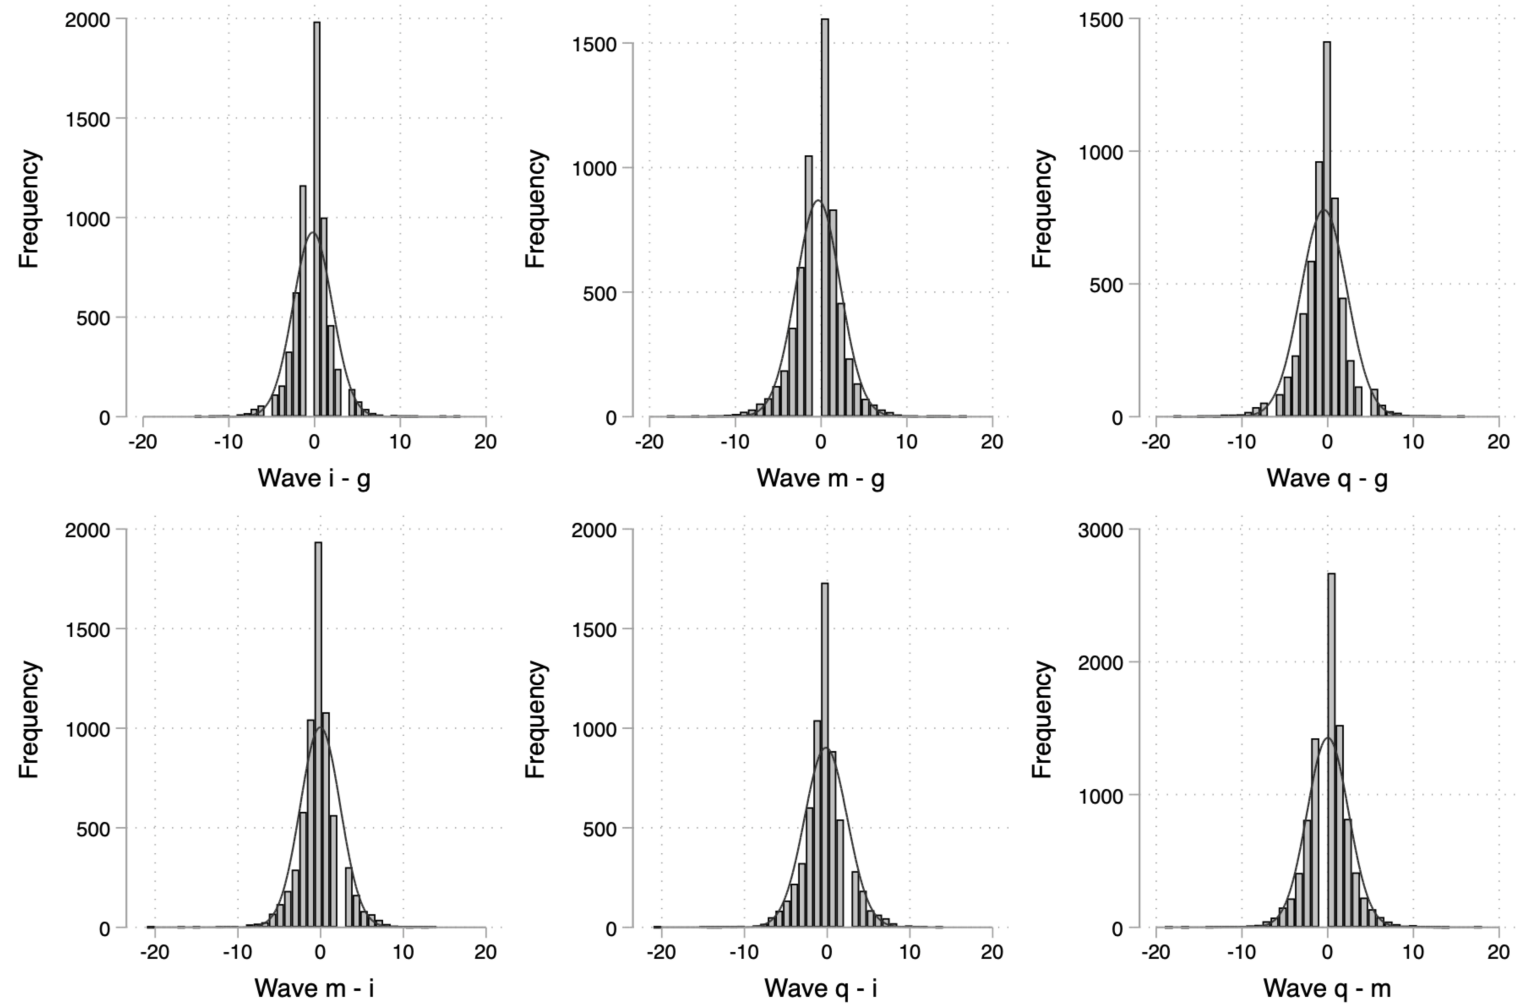

Note: Names of the waves correspond to the waves in the original HILDA dataset. Wave i is wave 1 in the current study. Wave g is wave 2 in the current study. Wave m is wave 3 in the current study. Wave q is wave 4 in the current study.

## Individual variation in fruit across waves

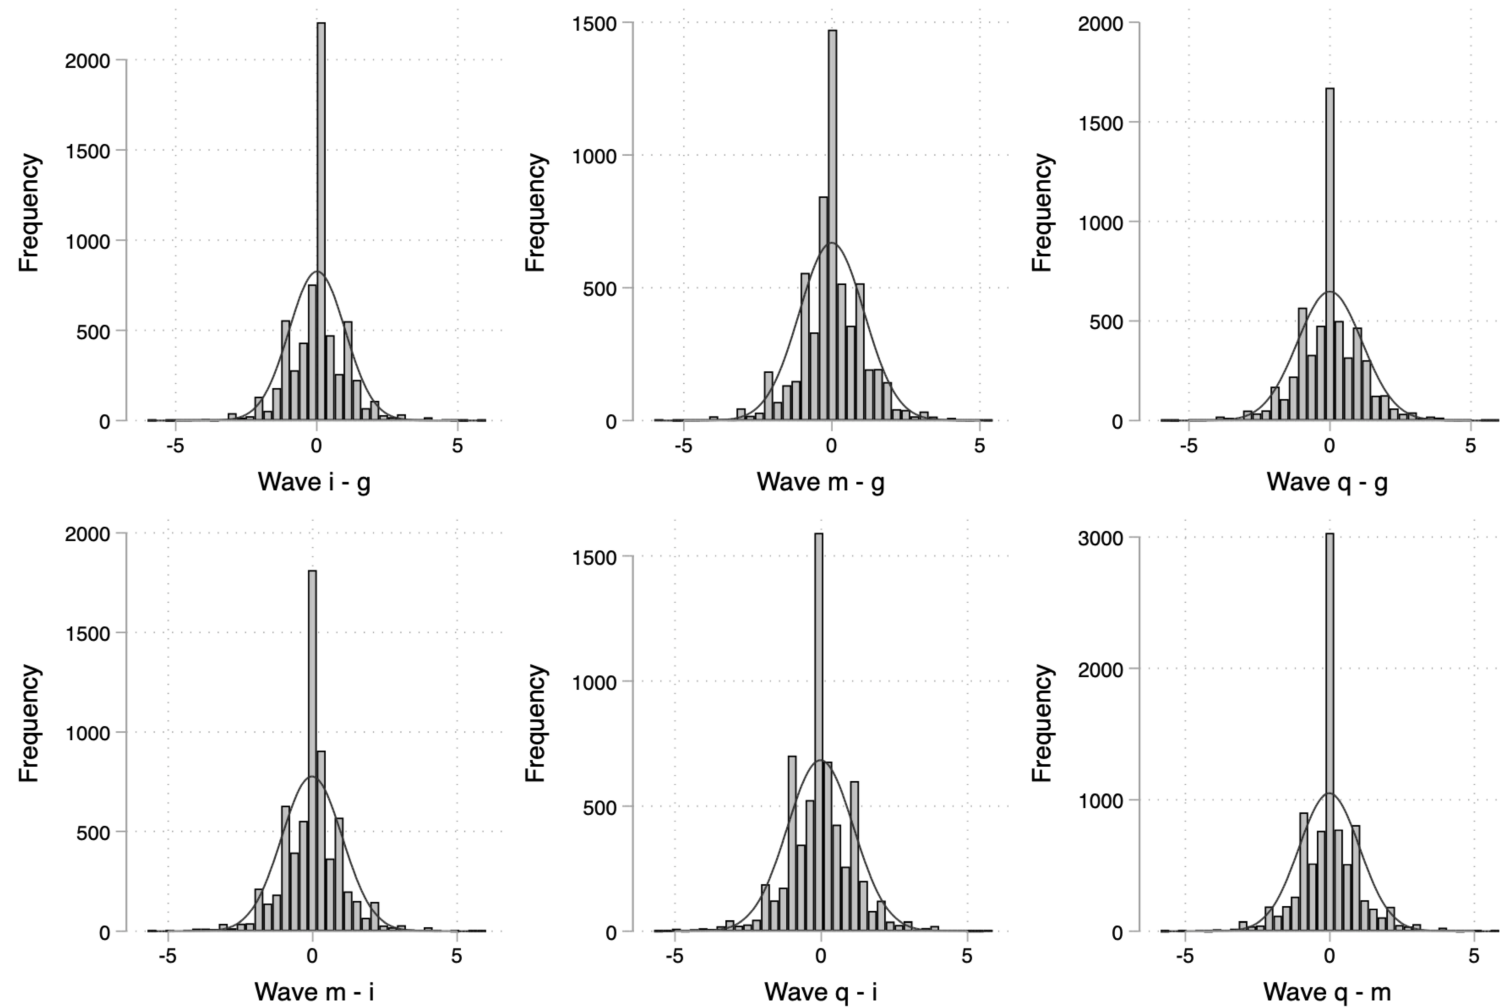

Note: Names of the waves correspond to the waves in the original HILDA dataset. Wave i is wave 1 in the current study. Wave g is wave 2 in the current study. Wave m is wave 3 in the current study. Wave q is wave 4 in the current study



## Individual variation in vegetables across waves

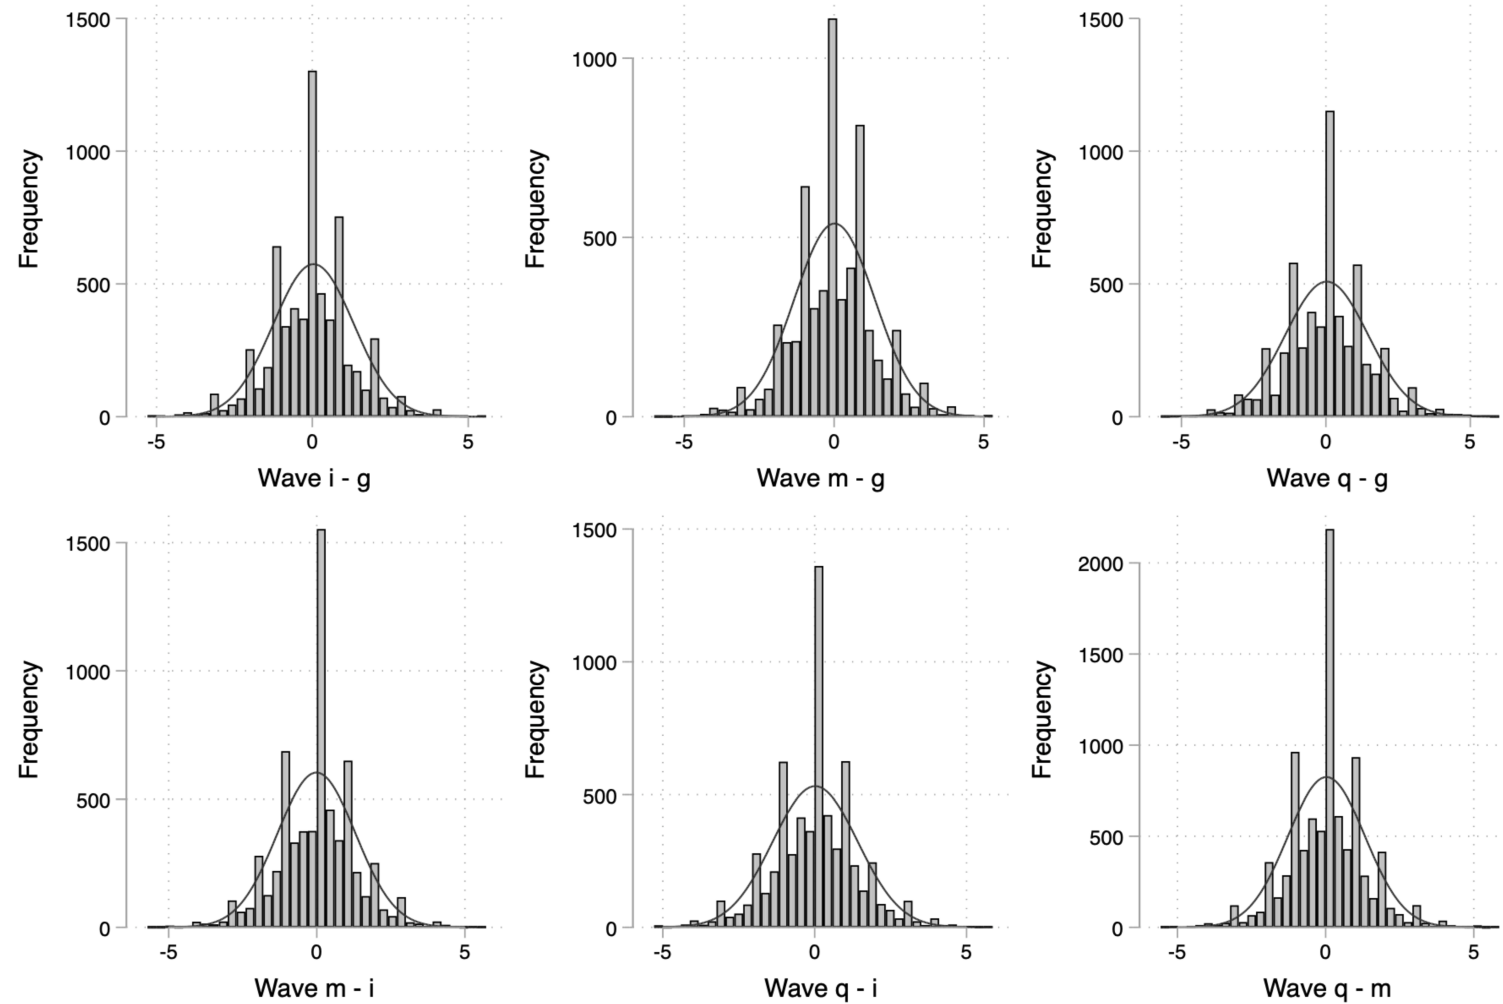

Note: Names of the waves correspond to the waves in the original HILDA dataset. Wave i is wave 1 in the current study. Wave g is wave 2 in the current study. Wave m is wave 3 in the current study. Wave q is wave 4 in the current study.
