# Supplementary material for: Influence of work hours and commute time on food practices: a longitudinal analysis of the Household, Income and Labour Dynamics in Australia Survey
Source: HighWire-hosted journal article supplement (doi:10.1136/bmjopen-2021-056212), 2022-05-01
Supplement: bmjopen-2021-056212supp004_data_supplement.pdf [file bmjopen-2021-056212supp004_data_supplement.pdf]

**Supplementary file 4:** Poisson and linear mixed effects models<sup>a</sup> of weekly out-of-home food purchasing and daily fruit and vegetables

consumption

|                       | Work hours         |                     |         | Commute hours      |                     |         | Combined work and commute hours |                     |         |
|-----------------------|--------------------|---------------------|---------|--------------------|---------------------|---------|---------------------------------|---------------------|---------|
|                       | IRR <sup>b</sup>   | 95% CI <sup>c</sup> | p-value | IRR <sup>b</sup>   | 95% CI <sup>c</sup> | p-value | IRR <sup>b</sup>                | 95% CI <sup>c</sup> | p-value |
| <b>Breakfast</b>      | 1.016              | (1.014, 1.018)      | <0.001  | 1.043              | (1.036, 1.050)      | <0.001  | 1.016                           | (1.014, 1.018)      | <0.001  |
| <b>Lunch</b>          | 1.007              | (1.006, 1.008)      | <0.001  | 1.021              | (1.018, 1.024)      | <0.001  | 1.007                           | (1.006, 1.008)      | <0.001  |
| <b>Dinner</b>         | 1.008              | (1.007, 1.009)      | <0.001  | 1.013              | (1.010, 1.016)      | <0.001  | 1.007                           | (1.006, 1.008)      | <0.001  |
| <b>Total food out</b> | 1.008              | (1.007, 1.009)      | <0.001  | 1.020              | (1.017, 1.022)      | <0.001  | 1.008                           | (1.007, 1.009)      | <0.001  |
|                       |                    |                     |         |                    |                     |         |                                 |                     |         |
|                       | Coef. <sup>d</sup> | 95% CI <sup>c</sup> | p-value | Coef. <sup>d</sup> | 95% CI <sup>c</sup> | p-value | Coef. <sup>d</sup>              | 95% CI <sup>c</sup> | p-value |
| <b>Fruit</b>          | -0.002             | (-0.003, -0.001)    | <0.001  | -0.004             | (-0.007, -0.001)    | 0.007   | -0.002                          | (-0.003, -0.001)    | <0.001  |
| <b>Vegetables</b>     | -0.002             | (-0.003, -0.001)    | 0.003   | -0.007             | (-0.010, -0.003)    | <0.001  | -0.002                          | (-0.003, -0.001)    | 0.001   |

<sup>a</sup> Models adjusted for age, sex, education, household composition, remoteness, neighbourhood SES and work schedule, <sup>b</sup> IRR: incidence rateratio, <sup>c</sup> CI: confidence interval, <sup>d</sup> Coef.: coefficient. Sample size for each analysis is presented in Supplementary file 2.
