# Supplementary material for: Influence of work hours and commute time on food practices: a longitudinal analysis of the Household, Income and Labour Dynamics in Australia Survey
Source: HighWire-hosted journal article supplement (doi:10.1136/bmjopen-2021-056212), 2022-05-01
Supplement: bmjopen-2021-056212supp005_data_supplement.pdf [file bmjopen-2021-056212supp005_data_supplement.pdf]

|    | A                                                                                                                                                                                                                                                                                                                                                                            | B     | C         | D     | E              | F                                            | G                            | H     | I         | J     | K              | L |  |
|----|------------------------------------------------------------------------------------------------------------------------------------------------------------------------------------------------------------------------------------------------------------------------------------------------------------------------------------------------------------------------------|-------|-----------|-------|----------------|----------------------------------------------|------------------------------|-------|-----------|-------|----------------|---|--|
| 1  | <b>Analysis:</b> Mixed effects models with random intercepts for study participant and robust standard errors were fitted to examine associations between each of the three exposures with each of the six food practices, with Poisson mixed models used for the out-of-home food purchasing outcomes and linear mixed models fitted for the fruit and vegetables outcomes. |       |           |       |                |                                              |                              |       |           |       |                |   |  |
| 2  | <b>Weekly frequency of out-of-home food purchasing:</b> How often in a usual week do you buy breakfast/lunch/dinner from a restaurant, café, fast food outlet, or any other place that prepares and sells meals?                                                                                                                                                             |       |           |       |                |                                              |                              |       |           |       |                |   |  |
| 3  | <b>Daily average fruit intake:</b> Including tinned, frozen, dried and fresh fruit, on how many days in a usual week do you eat fruit? On a day when you eat fruit, how many serves of fruit do you usually eat? Daily average (days*servings)/7                                                                                                                             |       |           |       |                |                                              |                              |       |           |       |                |   |  |
| 4  | <b>Daily average vegetables intake:</b> Including tinned, frozen and fresh vegetables, on how many days in a usual week do you eat vegetables? On a day when you eat vegetables, how many serves of vegetables do you usually eat? Daily average (days*servings)/7                                                                                                           |       |           |       |                |                                              |                              |       |           |       |                |   |  |
| 5  | Adjusted for confounders: Age, sex, education, household composition, remoteness, neighbourhood SES, work schedule                                                                                                                                                                                                                                                           |       |           |       |                |                                              |                              |       |           |       |                |   |  |
| 6  | <b>WORK HOURS ANALYSIS</b>                                                                                                                                                                                                                                                                                                                                                   |       |           |       |                |                                              |                              |       |           |       |                |   |  |
| 7  | <b>BREAKFAST (mixed effects)</b>                                                                                                                                                                                                                                                                                                                                             |       |           |       |                |                                              | <b>LUNCH (mixed effects)</b> |       |           |       |                |   |  |
| 8  |                                                                                                                                                                                                                                                                                                                                                                              | IRR   | Robust SE | p     | 95% CI         |                                              |                              | IRR   | Robust SE | p     | 95% CI         |   |  |
| 9  | Work hours                                                                                                                                                                                                                                                                                                                                                                   | 1.016 | 0.001     | 0.000 | (1.014, 1.018) | Work hours                                   | 1.007                        | 0.000 | 0.000     | 0.000 | (1.006, 1.008) |   |  |
| 10 | Age (Years)                                                                                                                                                                                                                                                                                                                                                                  | 0.966 | 0.001     | 0.000 | (0.963, 0.968) | Age (Years)                                  | 0.977                        | 0.001 | 0.000     | 0.000 | (0.976, 0.979) |   |  |
| 11 | Sex (Female)                                                                                                                                                                                                                                                                                                                                                                 | 0.629 | 0.021     | 0.000 | (0.589, 0.672) | Sex (Female)                                 | 0.756                        | 0.013 | 0.000     | 0.000 | (0.731, 0.782) |   |  |
| 12 | Household composition (Single parent)                                                                                                                                                                                                                                                                                                                                        | 0.649 | 0.096     | 0.003 | (0.486, 0.867) | Household composition                        | 0.900                        | 0.047 | 0.041     | 0.041 | (0.813, 0.996) |   |  |
| 13 | Household composition (Multi-person without children)                                                                                                                                                                                                                                                                                                                        | 0.767 | 0.031     | 0.000 | (0.709, 0.829) | Household composition                        | 0.845                        | 0.016 | 0.000     | 0.000 | (0.814, 0.876) |   |  |
| 14 | Household composition (Multi-person with children)                                                                                                                                                                                                                                                                                                                           | 0.610 | 0.028     | 0.000 | (0.558, 0.668) | Household composition                        | 0.796                        | 0.017 | 0.000     | 0.000 | (0.764, 0.829) |   |  |
| 15 | Neighbourhood SES Index of Advantage/Disadvantage (2nd decile)                                                                                                                                                                                                                                                                                                               | 0.968 | 0.084     | 0.706 | (0.817, 1.146) | Neighbourhood SES Index                      | 1.040                        | 0.039 | 0.302     | 0.302 | (0.966, 1.119) |   |  |
| 16 | Neighbourhood SES Index of Advantage/Disadvantage (3rd decile)                                                                                                                                                                                                                                                                                                               | 0.940 | 0.077     | 0.453 | (0.800, 1.105) | Neighbourhood SES Index                      | 1.043                        | 0.037 | 0.238     | 0.238 | (0.972, 1.119) |   |  |
| 17 | Neighbourhood SES Index of Advantage/Disadvantage (4th decile)                                                                                                                                                                                                                                                                                                               | 0.986 | 0.082     | 0.863 | (0.838, 1.160) | Neighbourhood SES Index                      | 1.050                        | 0.038 | 0.182     | 0.182 | (0.978, 1.127) |   |  |
| 18 | Neighbourhood SES Index of Advantage/Disadvantage (5th decile)                                                                                                                                                                                                                                                                                                               | 0.889 | 0.072     | 0.146 | (0.759, 1.042) | Neighbourhood SES Index                      | 1.014                        | 0.036 | 0.692     | 0.692 | (0.945, 1.088) |   |  |
| 19 | Neighbourhood SES Index of Advantage/Disadvantage (6th decile)                                                                                                                                                                                                                                                                                                               | 0.957 | 0.077     | 0.583 | (0.817, 1.120) | Neighbourhood SES Index                      | 1.047                        | 0.038 | 0.202     | 0.202 | (0.976, 1.124) |   |  |
| 20 | Neighbourhood SES Index of Advantage/Disadvantage (7th decile)                                                                                                                                                                                                                                                                                                               | 0.922 | 0.072     | 0.302 | (0.791, 1.076) | Neighbourhood SES Index                      | 1.084                        | 0.038 | 0.022     | 0.022 | (1.012, 1.162) |   |  |
| 21 | Neighbourhood SES Index of Advantage/Disadvantage (8th decile)                                                                                                                                                                                                                                                                                                               | 0.992 | 0.078     | 0.922 | (0.850, 1.158) | Neighbourhood SES Index                      | 1.114                        | 0.039 | 0.002     | 0.002 | (1.040, 1.194) |   |  |
| 22 | Neighbourhood SES Index of Advantage/Disadvantage (9th decile)                                                                                                                                                                                                                                                                                                               | 1.083 | 0.083     | 0.298 | (0.932, 1.260) | Neighbourhood SES Index                      | 1.173                        | 0.041 | 0.000     | 0.000 | (1.095, 1.257) |   |  |
| 23 | Neighbourhood SES Index of Advantage/Disadvantage (Highest decile)                                                                                                                                                                                                                                                                                                           | 1.256 | 0.097     | 0.003 | (1.079, 1.463) | Neighbourhood SES Index                      | 1.307                        | 0.046 | 0.000     | 0.000 | (1.220, 1.401) |   |  |
| 24 | Remoteness (Inner Regional Australia)                                                                                                                                                                                                                                                                                                                                        | 0.722 | 0.035     | 0.000 | (0.656, 0.794) | Remoteness (Inner Regional Australia)        | 0.845                        | 0.018 | 0.000     | 0.000 | (0.810, 0.881) |   |  |
| 25 | Remoteness (Outer Regional Australia)                                                                                                                                                                                                                                                                                                                                        | 0.750 | 0.044     | 0.000 | (0.670, 0.841) | Remoteness (Outer Regional Australia)        | 0.823                        | 0.024 | 0.000     | 0.000 | (0.777, 0.872) |   |  |
| 26 | Remoteness (Remote or very remote Australia)                                                                                                                                                                                                                                                                                                                                 | 0.671 | 0.091     | 0.003 | (0.515, 0.875) | Remoteness (Remote or very remote Australia) | 0.665                        | 0.048 | 0.000     | 0.000 | (0.578, 0.765) |   |  |
| 27 | Schedule (Other)                                                                                                                                                                                                                                                                                                                                                             | 0.906 | 0.030     | 0.003 | (0.849, 0.967) | Schedule (Other)                             | 0.930                        | 0.014 | 0.000     | 0.000 | (0.902, 0.957) |   |  |
| 28 | Tertiary education                                                                                                                                                                                                                                                                                                                                                           | 1.026 | 0.036     | 0.467 | (0.958, 1.098) | Tertiary education                           | 1.033                        | 0.019 | 0.072     | 0.072 | (0.997, 1.070) |   |  |
| 29 | Random intercept                                                                                                                                                                                                                                                                                                                                                             | 1.599 | 0.044     |       | (1.515, 1.688) | Random intercept                             | 0.545                        | 0.012 |           |       | (0.522, 0.570) |   |  |
| 30 |                                                                                                                                                                                                                                                                                                                                                                              |       |           |       |                |                                              |                              |       |           |       |                |   |  |

|    | M                                                                  | N     | O         | P     | Q              | R                                            | S                             | T     | U         | V              | W      | X |
|----|--------------------------------------------------------------------|-------|-----------|-------|----------------|----------------------------------------------|-------------------------------|-------|-----------|----------------|--------|---|
| 1  |                                                                    |       |           |       |                |                                              |                               |       |           |                |        |   |
| 2  |                                                                    |       |           |       |                |                                              |                               |       |           |                |        |   |
| 3  |                                                                    |       |           |       |                |                                              |                               |       |           |                |        |   |
| 4  |                                                                    |       |           |       |                |                                              |                               |       |           |                |        |   |
| 5  |                                                                    |       |           |       |                |                                              |                               |       |           |                |        |   |
| 6  |                                                                    |       |           |       |                |                                              |                               |       |           |                |        |   |
| 7  | DINNER (mixed effects)                                             |       |           |       |                |                                              | EAT OUT TOTAL (mixed effects) |       |           |                |        |   |
| 8  |                                                                    | IRR   | Robust SE | p     | 95% CI         |                                              |                               | IRR   | Robust SE | p              | 95% CI |   |
| 9  | Work hours                                                         | 1.008 | 0.000     | 0.000 | (1.007, 1.009) | Work hours                                   | 1.008                         | 0.000 | 0.000     | (1.007, 1.009) |        |   |
| 10 | Age (Years)                                                        | 0.982 | 0.000     | 0.000 | (0.981, 0.983) | Age (Years)                                  | 0.978                         | 0.000 | 0.000     | (0.978, 0.979) |        |   |
| 11 | Sex (Female)                                                       | 0.909 | 0.012     | 0.000 | (0.885, 0.934) | Sex (Female)                                 | 0.792                         | 0.011 | 0.000     | (0.771, 0.814) |        |   |
| 12 | Household composition (Single parent)                              | 0.879 | 0.039     | 0.004 | (0.806, 0.960) | Household composition                        | 0.856                         | 0.035 | 0.000     | (0.790, 0.927) |        |   |
| 13 | Household composition (Multi-person without children)              | 0.823 | 0.014     | 0.000 | (0.795, 0.852) | Household composition                        | 0.837                         | 0.013 | 0.000     | (0.811, 0.863) |        |   |
| 14 | Household composition (Multi-person with children)                 | 0.692 | 0.013     | 0.000 | (0.667, 0.719) | Household composition                        | 0.750                         | 0.013 | 0.000     | (0.725, 0.776) |        |   |
| 15 | Neighbourhood SES Index of Advantage/Disadvantage (2nd decile)     | 0.997 | 0.033     | 0.937 | (0.936, 1.063) | Neighbourhood SES Index                      | 1.018                         | 0.033 | 0.578     | (0.955, 1.086) |        |   |
| 16 | Neighbourhood SES Index of Advantage/Disadvantage (3rd decile)     | 0.975 | 0.031     | 0.424 | (0.915, 1.038) | Neighbourhood SES Index                      | 1.013                         | 0.030 | 0.661     | (0.955, 1.075) |        |   |
| 17 | Neighbourhood SES Index of Advantage/Disadvantage (4th decile)     | 0.976 | 0.031     | 0.439 | (0.916, 1.039) | Neighbourhood SES Index                      | 1.020                         | 0.031 | 0.519     | (0.961, 1.083) |        |   |
| 18 | Neighbourhood SES Index of Advantage/Disadvantage (5th decile)     | 0.971 | 0.030     | 0.346 | (0.914, 1.032) | Neighbourhood SES Index                      | 0.981                         | 0.029 | 0.513     | (0.925, 1.040) |        |   |
| 19 | Neighbourhood SES Index of Advantage/Disadvantage (6th decile)     | 1.041 | 0.032     | 0.183 | (0.981, 1.105) | Neighbourhood SES Index                      | 1.033                         | 0.030 | 0.263     | (0.976, 1.094) |        |   |
| 20 | Neighbourhood SES Index of Advantage/Disadvantage (7th decile)     | 0.968 | 0.030     | 0.292 | (0.912, 1.028) | Neighbourhood SES Index                      | 1.022                         | 0.030 | 0.456     | (0.965, 1.082) |        |   |
| 21 | Neighbourhood SES Index of Advantage/Disadvantage (8th decile)     | 1.019 | 0.031     | 0.544 | (0.960, 1.081) | Neighbourhood SES Index                      | 1.057                         | 0.031 | 0.057     | (0.998, 1.118) |        |   |
| 22 | Neighbourhood SES Index of Advantage/Disadvantage (9th decile)     | 1.016 | 0.031     | 0.601 | (0.957, 1.079) | Neighbourhood SES Index                      | 1.092                         | 0.032 | 0.003     | (1.031, 1.157) |        |   |
| 23 | Neighbourhood SES Index of Advantage/Disadvantage (Highest decile) | 1.104 | 0.033     | 0.001 | (1.042, 1.171) | Neighbourhood SES Index                      | 1.200                         | 0.035 | 0.000     | (1.133, 1.272) |        |   |
| 24 | Remoteness (Inner Regional Australia)                              | 0.772 | 0.014     | 0.000 | (0.744, 0.800) | Remoteness (Inner Regional Australia)        | 0.810                         | 0.015 | 0.000     | (0.782, 0.839) |        |   |
| 25 | Remoteness (Outer Regional Australia)                              | 0.733 | 0.019     | 0.000 | (0.698, 0.771) | Remoteness (Outer Regional Australia)        | 0.779                         | 0.019 | 0.000     | (0.743, 0.816) |        |   |
| 26 | Remoteness (Remote or very remote Australia)                       | 0.576 | 0.036     | 0.000 | (0.510, 0.650) | Remoteness (Remote or very remote Australia) | 0.637                         | 0.038 | 0.000     | (0.567, 0.715) |        |   |
| 27 | Schedule (Other)                                                   | 1.063 | 0.015     | 0.000 | (1.035, 1.092) | Schedule (Other)                             | 0.968                         | 0.012 | 0.008     | (0.945, 0.992) |        |   |
| 28 | Tertiary education                                                 | 1.033 | 0.015     | 0.020 | (1.005, 1.062) | Tertiary education                           | 1.033                         | 0.015 | 0.023     | (1.005, 1.063) |        |   |
| 29 | Random intercept                                                   | 0.131 | 0.007     |       | (0.119, 0.145) | Random intercept                             | 0.419                         | 0.008 |           | (0.403, 0.436) |        |   |
| 30 |                                                                    |       |           |       |                |                                              |                               |       |           |                |        |   |

|    | Y                                                                  | Z      | AA        | AB    | AC               | AD | AE                         | AF     | AG        | AH    | AI               |
|----|--------------------------------------------------------------------|--------|-----------|-------|------------------|----|----------------------------|--------|-----------|-------|------------------|
| 1  |                                                                    |        |           |       |                  |    |                            |        |           |       |                  |
| 2  |                                                                    |        |           |       |                  |    |                            |        |           |       |                  |
| 3  |                                                                    |        |           |       |                  |    |                            |        |           |       |                  |
| 4  |                                                                    |        |           |       |                  |    |                            |        |           |       |                  |
| 5  |                                                                    |        |           |       |                  |    |                            |        |           |       |                  |
| 6  |                                                                    |        |           |       |                  |    |                            |        |           |       |                  |
| 7  | FRUIT (mixed effects)                                              |        |           |       |                  |    | VEGETABLES (mixed effects) |        |           |       |                  |
| 8  |                                                                    | Coef.  | Robust SE | p     | 95% CI           |    |                            | Coef.  | Robust SE | p     | 95% CI           |
| 9  | Work hours                                                         | -0.002 | 0.000     | 0.000 | (-0.003, -0.001) |    | Work hours                 | -0.002 | 0.001     | 0.003 | (-0.003, -0.001) |
| 10 | Age (Years)                                                        | 0.007  | 0.001     | 0.000 | (0.006, 0.008)   |    | Age (Years)                | 0.014  | 0.001     | 0.000 | (0.013, 0.015)   |
| 11 | Sex (Female)                                                       | 0.184  | 0.016     | 0.000 | (0.152, 0.217)   |    | Sex (Female)               | 0.299  | 0.019     | 0.000 | (0.262, 0.336)   |
| 12 | Household composition (Single parent)                              | -0.067 | 0.052     | 0.194 | (-0.168, 0.034)  |    | Household composition (S   | 0.118  | 0.062     | 0.058 | (-0.004, 0.239)  |
| 13 | Household composition (Multi-person without children)              | -0.082 | 0.020     | 0.000 | (-0.120, -0.043) |    | Household composition (N   | 0.119  | 0.024     | 0.000 | (0.071, 0.167)   |
| 14 | Household composition (Multi-person with children)                 | -0.072 | 0.021     | 0.001 | (-0.114, -0.031) |    | Household composition (N   | 0.138  | 0.026     | 0.000 | (0.087, 0.189)   |
| 15 | Neighbourhood SES Index of Advantage/Disadvantage (2nd decile)     | 0.016  | 0.032     | 0.617 | (-0.047, 0.079)  |    | Neighbourhood SES Index    | 0.091  | 0.039     | 0.018 | (0.016, 0.167)   |
| 16 | Neighbourhood SES Index of Advantage/Disadvantage (3rd decile)     | 0.062  | 0.032     | 0.055 | (-0.001, 0.125)  |    | Neighbourhood SES Index    | 0.077  | 0.038     | 0.044 | (0.002, 0.151)   |
| 17 | Neighbourhood SES Index of Advantage/Disadvantage (4th decile)     | 0.069  | 0.032     | 0.033 | (0.006, 0.133)   |    | Neighbourhood SES Index    | 0.113  | 0.038     | 0.003 | (0.038, 0.188)   |
| 18 | Neighbourhood SES Index of Advantage/Disadvantage (5th decile)     | 0.102  | 0.032     | 0.001 | (0.040, 0.164)   |    | Neighbourhood SES Index    | 0.131  | 0.037     | 0.000 | (0.058, 0.205)   |
| 19 | Neighbourhood SES Index of Advantage/Disadvantage (6th decile)     | 0.118  | 0.032     | 0.000 | (0.055, 0.181)   |    | Neighbourhood SES Index    | 0.131  | 0.038     | 0.001 | (0.057, 0.205)   |
| 20 | Neighbourhood SES Index of Advantage/Disadvantage (7th decile)     | 0.163  | 0.033     | 0.000 | (0.098, 0.228)   |    | Neighbourhood SES Index    | 0.166  | 0.038     | 0.000 | (0.092, 0.240)   |
| 21 | Neighbourhood SES Index of Advantage/Disadvantage (8th decile)     | 0.200  | 0.033     | 0.000 | (0.136, 0.264)   |    | Neighbourhood SES Index    | 0.217  | 0.038     | 0.000 | (0.143, 0.291)   |
| 22 | Neighbourhood SES Index of Advantage/Disadvantage (9th decile)     | 0.175  | 0.032     | 0.000 | (0.112, 0.238)   |    | Neighbourhood SES Index    | 0.270  | 0.039     | 0.000 | (0.195, 0.346)   |
| 23 | Neighbourhood SES Index of Advantage/Disadvantage (Highest decile) | 0.235  | 0.034     | 0.000 | (0.169, 0.300)   |    | Neighbourhood SES Index    | 0.333  | 0.039     | 0.000 | (0.255, 0.410)   |
| 24 | Remoteness (Inner Regional Australia)                              | 0.014  | 0.020     | 0.467 | (-0.024, 0.052)  |    | Remoteness (Inner Regional | 0.300  | 0.022     | 0.000 | (0.256, 0.344)   |
| 25 | Remoteness (Outer Regional Australia)                              | -0.030 | 0.026     | 0.245 | (-0.081, 0.021)  |    | Remoteness (Outer Regional | 0.330  | 0.031     | 0.000 | (0.269, 0.390)   |
| 26 | Remoteness (Remote or very remote Australia)                       | -0.011 | 0.054     | 0.837 | (-0.117, 0.094)  |    | Remoteness (Remote or ve   | 0.361  | 0.067     | 0.000 | (0.231, 0.492)   |
| 27 | Schedule (Other)                                                   | 0.020  | 0.015     | 0.168 | (-0.008, 0.049)  |    | Schedule (Other)           | -0.014 | 0.017     | 0.413 | (-0.048, 0.020)  |
| 28 | Tertiary education                                                 | 0.138  | 0.017     | 0.000 | (0.105, 0.172)   |    | Tertiary education         | 0.227  | 0.020     | 0.000 | (0.188, 0.267)   |
| 29 | Random intercept                                                   | 0.59   | 0.01      |       | (0.57, 0.62)     |    | Random intercept           | 0.68   | 0.02      |       | (0.65, 0.71)     |
| 30 | Residual                                                           | 0.56   | 0.01      |       | (0.54, 0.58)     |    | Residual                   | 0.88   | 0.01      |       | (0.86, 0.91)     |

|    | A                                                                  | B     | C         | D     | E              | F                                            | G     | H     | I         | J              | K      | L |
|----|--------------------------------------------------------------------|-------|-----------|-------|----------------|----------------------------------------------|-------|-------|-----------|----------------|--------|---|
| 31 |                                                                    |       |           |       |                |                                              |       |       |           |                |        |   |
| 32 | <b>COMMUTE TIME ANALYSIS</b>                                       |       |           |       |                |                                              |       |       |           |                |        |   |
| 33 | <b>BREAKFAST (mixed effects)</b>                                   |       |           |       |                | <b>LUNCH (mixed effects)</b>                 |       |       |           |                |        |   |
| 34 |                                                                    | IRR   | Robust SE | p     | 95% CI         |                                              |       | IRR   | Robust SE | p              | 95% CI |   |
| 35 | Commute time (hours)                                               | 1.043 | 0.004     | 0.000 | (1.036, 1.050) | Commute time (hours)                         | 1.021 | 0.002 | 0.000     | (1.018, 1.024) |        |   |
| 36 | Age (Years)                                                        | 0.967 | 0.001     | 0.000 | (0.965, 0.969) | Age (Years)                                  | 0.978 | 0.001 | 0.000     | (0.977, 0.979) |        |   |
| 37 | Sex (Female)                                                       | 0.576 | 0.019     | 0.000 | (0.540, 0.615) | Sex (Female)                                 | 0.725 | 0.012 | 0.000     | (0.701, 0.749) |        |   |
| 38 | Household composition (Single parent)                              | 0.596 | 0.083     | 0.000 | (0.454, 0.783) | Household composition                        | 0.874 | 0.046 | 0.010     | (0.788, 0.968) |        |   |
| 39 | Household composition (Multi-person without children)              | 0.749 | 0.030     | 0.000 | (0.693, 0.811) | Household composition                        | 0.837 | 0.016 | 0.000     | (0.806, 0.868) |        |   |
| 40 | Household composition (Multi-person with children)                 | 0.583 | 0.027     | 0.000 | (0.533, 0.639) | Household composition                        | 0.781 | 0.016 | 0.000     | (0.750, 0.814) |        |   |
| 41 | Neighbourhood SES Index of Advantage/Disadvantage (2nd decile)     | 0.992 | 0.086     | 0.926 | (0.838, 1.175) | Neighbourhood SES Index                      | 1.046 | 0.040 | 0.235     | (0.971, 1.127) |        |   |
| 42 | Neighbourhood SES Index of Advantage/Disadvantage (3rd decile)     | 0.926 | 0.076     | 0.349 | (0.788, 1.088) | Neighbourhood SES Index                      | 1.051 | 0.038 | 0.172     | (0.979, 1.128) |        |   |
| 43 | Neighbourhood SES Index of Advantage/Disadvantage (4th decile)     | 0.993 | 0.082     | 0.935 | (0.846, 1.167) | Neighbourhood SES Index                      | 1.055 | 0.038 | 0.144     | (0.982, 1.133) |        |   |
| 44 | Neighbourhood SES Index of Advantage/Disadvantage (5th decile)     | 0.886 | 0.071     | 0.132 | (0.757, 1.037) | Neighbourhood SES Index                      | 1.012 | 0.036 | 0.747     | (0.943, 1.086) |        |   |
| 45 | Neighbourhood SES Index of Advantage/Disadvantage (6th decile)     | 0.974 | 0.079     | 0.745 | (0.832, 1.141) | Neighbourhood SES Index                      | 1.057 | 0.038 | 0.127     | (0.985, 1.134) |        |   |
| 46 | Neighbourhood SES Index of Advantage/Disadvantage (7th decile)     | 0.921 | 0.073     | 0.297 | (0.789, 1.075) | Neighbourhood SES Index                      | 1.091 | 0.039 | 0.014     | (1.018, 1.169) |        |   |
| 47 | Neighbourhood SES Index of Advantage/Disadvantage (8th decile)     | 0.993 | 0.079     | 0.932 | (0.851, 1.160) | Neighbourhood SES Index                      | 1.113 | 0.039 | 0.002     | (1.039, 1.193) |        |   |
| 48 | Neighbourhood SES Index of Advantage/Disadvantage (9th decile)     | 1.089 | 0.084     | 0.271 | (0.936, 1.267) | Neighbourhood SES Index                      | 1.182 | 0.042 | 0.000     | (1.103, 1.267) |        |   |
| 49 | Neighbourhood SES Index of Advantage/Disadvantage (Highest decile) | 1.285 | 0.100     | 0.001 | (1.104, 1.497) | Neighbourhood SES Index                      | 1.324 | 0.047 | 0.000     | (1.236, 1.419) |        |   |
| 50 | Remoteness (Inner Regional Australia)                              | 0.734 | 0.036     | 0.000 | (0.667, 0.807) | Remoteness (Inner Regional Australia)        | 0.854 | 0.018 | 0.000     | (0.819, 0.891) |        |   |
| 51 | Remoteness (Outer Regional Australia)                              | 0.832 | 0.048     | 0.001 | (0.743, 0.932) | Remoteness (Outer Regional Australia)        | 0.852 | 0.025 | 0.000     | (0.804, 0.903) |        |   |
| 52 | Remoteness (Remote or very remote Australia)                       | 0.791 | 0.102     | 0.069 | (0.615, 1.018) | Remoteness (Remote or very remote Australia) | 0.728 | 0.053 | 0.000     | (0.632, 0.839) |        |   |
| 53 | Schedule (Other)                                                   | 0.873 | 0.029     | 0.000 | (0.817, 0.932) | Schedule (Other)                             | 0.912 | 0.014 | 0.000     | (0.886, 0.940) |        |   |
| 54 | Tertiary education                                                 | 1.067 | 0.037     | 0.063 | (0.997, 1.141) | Tertiary education                           | 1.052 | 0.019 | 0.005     | (1.016, 1.090) |        |   |
| 55 | Random intercept                                                   | 1.620 | 0.045     |       | (1.535, 1.711) | Random intercept                             | 0.545 | 0.012 |           | (0.522, 0.570) |        |   |
| 56 |                                                                    |       |           |       |                |                                              |       |       |           |                |        |   |
| 57 |                                                                    |       |           |       |                |                                              |       |       |           |                |        |   |
| 58 |                                                                    |       |           |       |                |                                              |       |       |           |                |        |   |
| 59 |                                                                    |       |           |       |                |                                              |       |       |           |                |        |   |
| 60 |                                                                    |       |           |       |                |                                              |       |       |           |                |        |   |
| 61 |                                                                    |       |           |       |                |                                              |       |       |           |                |        |   |
| 62 |                                                                    |       |           |       |                |                                              |       |       |           |                |        |   |
| 63 |                                                                    |       |           |       |                |                                              |       |       |           |                |        |   |
| 64 |                                                                    |       |           |       |                |                                              |       |       |           |                |        |   |

|    | M                                                                  | N     | O         | P     | Q              | R                             | S                                            | T     | U         | V     | W              | X |
|----|--------------------------------------------------------------------|-------|-----------|-------|----------------|-------------------------------|----------------------------------------------|-------|-----------|-------|----------------|---|
| 31 |                                                                    |       |           |       |                |                               |                                              |       |           |       |                |   |
| 32 |                                                                    |       |           |       |                |                               |                                              |       |           |       |                |   |
| 33 | DINNER (mixed effects)                                             |       |           |       |                | EAT OUT TOTAL (mixed effects) |                                              |       |           |       |                |   |
| 34 |                                                                    | IRR   | Robust SE | p     | 95% CI         |                               |                                              | IRR   | Robust SE | p     | 95% CI         |   |
| 35 | Commute time (hours)                                               | 1.013 | 0.001     | 0.000 | (1.010, 1.016) |                               | Commute time (hours)                         | 1.020 | 0.001     | 0.000 | (1.017, 1.022) |   |
| 36 | Age (Years)                                                        | 0.983 | 0.000     | 0.000 | (0.982, 0.984) |                               | Age (Years)                                  | 0.979 | 0.000     | 0.000 | (0.978, 0.980) |   |
| 37 | Sex (Female)                                                       | 0.859 | 0.011     | 0.000 | (0.837, 0.882) |                               | Sex (Female)                                 | 0.752 | 0.010     | 0.000 | (0.733, 0.773) |   |
| 38 | Household composition (Single parent)                              | 0.855 | 0.039     | 0.001 | (0.782, 0.935) |                               | Household composition                        | 0.825 | 0.032     | 0.000 | (0.764, 0.891) |   |
| 39 | Household composition (Multi-person without children)              | 0.813 | 0.014     | 0.000 | (0.785, 0.841) |                               | Household composition                        | 0.826 | 0.013     | 0.000 | (0.800, 0.852) |   |
| 40 | Household composition (Multi-person with children)                 | 0.676 | 0.013     | 0.000 | (0.650, 0.702) |                               | Household composition                        | 0.730 | 0.013     | 0.000 | (0.705, 0.756) |   |
| 41 | Neighbourhood SES Index of Advantage/Disadvantage (2nd decile)     | 0.998 | 0.033     | 0.962 | (0.936, 1.065) |                               | Neighbourhood SES Index                      | 1.024 | 0.034     | 0.475 | (0.960, 1.092) |   |
| 42 | Neighbourhood SES Index of Advantage/Disadvantage (3rd decile)     | 0.978 | 0.032     | 0.500 | (0.918, 1.043) |                               | Neighbourhood SES Index                      | 1.017 | 0.031     | 0.585 | (0.958, 1.079) |   |
| 43 | Neighbourhood SES Index of Advantage/Disadvantage (4th decile)     | 0.973 | 0.031     | 0.400 | (0.914, 1.037) |                               | Neighbourhood SES Index                      | 1.022 | 0.031     | 0.476 | (0.962, 1.085) |   |
| 44 | Neighbourhood SES Index of Advantage/Disadvantage (5th decile)     | 0.975 | 0.030     | 0.408 | (0.917, 1.036) |                               | Neighbourhood SES Index                      | 0.980 | 0.030     | 0.507 | (0.924, 1.040) |   |
| 45 | Neighbourhood SES Index of Advantage/Disadvantage (6th decile)     | 1.049 | 0.032     | 0.120 | (0.988, 1.113) |                               | Neighbourhood SES Index                      | 1.041 | 0.031     | 0.169 | (0.983, 1.104) |   |
| 46 | Neighbourhood SES Index of Advantage/Disadvantage (7th decile)     | 0.970 | 0.030     | 0.317 | (0.913, 1.030) |                               | Neighbourhood SES Index                      | 1.026 | 0.030     | 0.391 | (0.968, 1.087) |   |
| 47 | Neighbourhood SES Index of Advantage/Disadvantage (8th decile)     | 1.016 | 0.031     | 0.607 | (0.957, 1.078) |                               | Neighbourhood SES Index                      | 1.055 | 0.031     | 0.068 | (0.996, 1.117) |   |
| 48 | Neighbourhood SES Index of Advantage/Disadvantage (9th decile)     | 1.014 | 0.031     | 0.650 | (0.954, 1.078) |                               | Neighbourhood SES Index                      | 1.096 | 0.033     | 0.002 | (1.034, 1.161) |   |
| 49 | Neighbourhood SES Index of Advantage/Disadvantage (Highest decile) | 1.108 | 0.033     | 0.001 | (1.045, 1.175) |                               | Neighbourhood SES Index                      | 1.212 | 0.036     | 0.000 | (1.144, 1.285) |   |
| 50 | Remoteness (Inner Regional Australia)                              | 0.778 | 0.015     | 0.000 | (0.750, 0.807) |                               | Remoteness (Inner Regional Australia)        | 0.817 | 0.015     | 0.000 | (0.788, 0.846) |   |
| 51 | Remoteness (Outer Regional Australia)                              | 0.762 | 0.020     | 0.000 | (0.725, 0.802) |                               | Remoteness (Outer Regional Australia)        | 0.812 | 0.020     | 0.000 | (0.774, 0.851) |   |
| 52 | Remoteness (Remote or very remote Australia)                       | 0.626 | 0.039     | 0.000 | (0.553, 0.708) |                               | Remoteness (Remote or very remote Australia) | 0.700 | 0.042     | 0.000 | (0.622, 0.788) |   |
| 53 | Schedule (Other)                                                   | 1.032 | 0.014     | 0.023 | (1.004, 1.060) |                               | Schedule (Other)                             | 0.946 | 0.012     | 0.000 | (0.923, 0.970) |   |
| 54 | Tertiary education                                                 | 1.057 | 0.015     | 0.000 | (1.028, 1.086) |                               | Tertiary education                           | 1.061 | 0.015     | 0.000 | (1.032, 1.092) |   |
| 55 | Random intercept                                                   | 0.137 | 0.007     |       | (0.124, 0.151) |                               | Random intercept                             | 0.426 | 0.008     |       | (0.410, 0.443) |   |
| 56 |                                                                    |       |           |       |                |                               |                                              |       |           |       |                |   |
| 57 |                                                                    |       |           |       |                |                               |                                              |       |           |       |                |   |
| 58 |                                                                    |       |           |       |                |                               |                                              |       |           |       |                |   |
| 59 |                                                                    |       |           |       |                |                               |                                              |       |           |       |                |   |
| 60 |                                                                    |       |           |       |                |                               |                                              |       |           |       |                |   |
| 61 |                                                                    |       |           |       |                |                               |                                              |       |           |       |                |   |
| 62 |                                                                    |       |           |       |                |                               |                                              |       |           |       |                |   |
| 63 |                                                                    |       |           |       |                |                               |                                              |       |           |       |                |   |
| 64 |                                                                    |       |           |       |                |                               |                                              |       |           |       |                |   |

|    | Y                                                                  | Z      | AA        | AB    | AC               | AD                         | AE                       | AF     | AG        | AH    | AI               |
|----|--------------------------------------------------------------------|--------|-----------|-------|------------------|----------------------------|--------------------------|--------|-----------|-------|------------------|
| 31 |                                                                    |        |           |       |                  |                            |                          |        |           |       |                  |
| 32 |                                                                    |        |           |       |                  |                            |                          |        |           |       |                  |
| 33 | FRUIT (mixed effects)                                              |        |           |       |                  | VEGETABLES (mixed effects) |                          |        |           |       |                  |
| 34 |                                                                    | Coef.  | Robust SE | p     | 95% CI           |                            |                          | Coef.  | Robust SE | p     | 95% CI           |
| 35 | Commute time (hours)                                               | -0.004 | 0.002     | 0.007 | (-0.007, -0.001) |                            | Commute time (hours)     | -0.007 | 0.002     | 0.000 | (-0.010, -0.003) |
| 36 | Age (Years)                                                        | 0.007  | 0.001     | 0.000 | (0.006, 0.008)   |                            | Age (Years)              | 0.014  | 0.001     | 0.000 | (0.013, 0.015)   |
| 37 | Sex (Female)                                                       | 0.203  | 0.016     | 0.000 | (0.172, 0.235)   |                            | Sex (Female)             | 0.312  | 0.018     | 0.000 | (0.276, 0.348)   |
| 38 | Household composition (Single parent)                              | -0.063 | 0.052     | 0.224 | (-0.164, 0.038)  |                            | Household composition (S | 0.120  | 0.063     | 0.056 | (-0.003, 0.242)  |
| 39 | Household composition (Multi-person without children)              | -0.078 | 0.020     | 0.000 | (-0.116, -0.039) |                            | Household composition (N | 0.120  | 0.025     | 0.000 | (0.071, 0.168)   |
| 40 | Household composition (Multi-person with children)                 | -0.065 | 0.021     | 0.002 | (-0.107, -0.023) |                            | Household composition (N | 0.142  | 0.026     | 0.000 | (0.091, 0.193)   |
| 41 | Neighbourhood SES Index of Advantage/Disadvantage (2nd decile)     | 0.009  | 0.033     | 0.790 | (-0.055, 0.073)  |                            | Neighbourhood SES Index  | 0.088  | 0.039     | 0.024 | (0.012, 0.165)   |
| 42 | Neighbourhood SES Index of Advantage/Disadvantage (3rd decile)     | 0.056  | 0.033     | 0.089 | (-0.008, 0.120)  |                            | Neighbourhood SES Index  | 0.075  | 0.039     | 0.051 | (-0.000, 0.151)  |
| 43 | Neighbourhood SES Index of Advantage/Disadvantage (4th decile)     | 0.059  | 0.033     | 0.076 | (-0.006, 0.123)  |                            | Neighbourhood SES Index  | 0.109  | 0.039     | 0.005 | (0.033, 0.185)   |
| 44 | Neighbourhood SES Index of Advantage/Disadvantage (5th decile)     | 0.095  | 0.032     | 0.003 | (0.032, 0.158)   |                            | Neighbourhood SES Index  | 0.126  | 0.038     | 0.001 | (0.052, 0.201)   |
| 45 | Neighbourhood SES Index of Advantage/Disadvantage (6th decile)     | 0.114  | 0.033     | 0.001 | (0.049, 0.178)   |                            | Neighbourhood SES Index  | 0.129  | 0.038     | 0.001 | (0.054, 0.204)   |
| 46 | Neighbourhood SES Index of Advantage/Disadvantage (7th decile)     | 0.156  | 0.034     | 0.000 | (0.090, 0.221)   |                            | Neighbourhood SES Index  | 0.167  | 0.038     | 0.000 | (0.092, 0.242)   |
| 47 | Neighbourhood SES Index of Advantage/Disadvantage (8th decile)     | 0.195  | 0.033     | 0.000 | (0.130, 0.259)   |                            | Neighbourhood SES Index  | 0.221  | 0.038     | 0.000 | (0.147, 0.296)   |
| 48 | Neighbourhood SES Index of Advantage/Disadvantage (9th decile)     | 0.170  | 0.033     | 0.000 | (0.106, 0.234)   |                            | Neighbourhood SES Index  | 0.267  | 0.039     | 0.000 | (0.191, 0.343)   |
| 49 | Neighbourhood SES Index of Advantage/Disadvantage (Highest decile) | 0.227  | 0.034     | 0.000 | (0.160, 0.294)   |                            | Neighbourhood SES Index  | 0.327  | 0.040     | 0.000 | (0.249, 0.405)   |
| 50 | Remoteness (Inner Regional Australia)                              | 0.013  | 0.020     | 0.520 | (-0.026, 0.051)  |                            | Remoteness (Inner Region | 0.295  | 0.023     | 0.000 | (0.251, 0.339)   |
| 51 | Remoteness (Outer Regional Australia)                              | -0.040 | 0.026     | 0.133 | (-0.091, 0.012)  |                            | Remoteness (Outer Region | 0.316  | 0.031     | 0.000 | (0.254, 0.378)   |
| 52 | Remoteness (Remote or very remote Australia)                       | -0.029 | 0.055     | 0.598 | (-0.137, 0.079)  |                            | Remoteness (Remote or ve | 0.324  | 0.068     | 0.000 | (0.191, 0.458)   |
| 53 | Schedule (Other)                                                   | 0.017  | 0.014     | 0.228 | (-0.011, 0.046)  |                            | Schedule (Other)         | -0.012 | 0.017     | 0.492 | (-0.045, 0.022)  |
| 54 | Tertiary education                                                 | 0.131  | 0.017     | 0.000 | (0.098, 0.164)   |                            | Tertiary education       | 0.221  | 0.020     | 0.000 | (0.182, 0.260)   |
| 55 | Random intercept                                                   | 0.59   | 0.01      |       | (0.57, 0.62)     |                            | Random intercept         | 0.68   | 0.02      |       | (0.65, 0.71)     |
| 56 | Residual                                                           | 0.56   | 0.01      |       | (0.54, 0.58)     |                            | Residual                 | 0.88   | 0.01      |       | (0.86, 0.91)     |
| 57 |                                                                    |        |           |       |                  |                            |                          |        |           |       |                  |
| 58 |                                                                    |        |           |       |                  |                            |                          |        |           |       |                  |
| 59 |                                                                    |        |           |       |                  |                            |                          |        |           |       |                  |
| 60 |                                                                    |        |           |       |                  |                            |                          |        |           |       |                  |
| 61 |                                                                    |        |           |       |                  |                            |                          |        |           |       |                  |
| 62 |                                                                    |        |           |       |                  |                            |                          |        |           |       |                  |
| 63 |                                                                    |        |           |       |                  |                            |                          |        |           |       |                  |
| 64 |                                                                    |        |           |       |                  |                            |                          |        |           |       |                  |

|    | A                                                                  | B     | C         | D     | E              | F                                                                  | G                            | H     | I         | J              | K      | L |
|----|--------------------------------------------------------------------|-------|-----------|-------|----------------|--------------------------------------------------------------------|------------------------------|-------|-----------|----------------|--------|---|
| 65 | <b>COMBINED WORK HOURS AND COMMUTE TIME ANALYSIS</b>               |       |           |       |                |                                                                    |                              |       |           |                |        |   |
| 66 | <b>BREAKFAST (mixed effects)</b>                                   |       |           |       |                |                                                                    | <b>LUNCH (mixed effects)</b> |       |           |                |        |   |
| 67 |                                                                    | IRR   | Robust SE | p     | 95% CI         |                                                                    |                              | IRR   | Robust SE | p              | 95% CI |   |
| 68 | Combined work hours and commute time                               | 1.016 | 0.001     | 0.000 | (1.014, 1.018) | Combined work hours and commute time                               | 1.007                        | 0.000 | 0.000     | (1.006, 1.008) |        |   |
| 69 | Age (Years)                                                        | 0.966 | 0.001     | 0.000 | (0.963, 0.968) | Age (Years)                                                        | 0.977                        | 0.001 | 0.000     | (0.976, 0.979) |        |   |
| 70 | Sex (Female)                                                       | 0.645 | 0.022     | 0.000 | (0.604, 0.690) | Sex (Female)                                                       | 0.763                        | 0.013 | 0.000     | (0.738, 0.789) |        |   |
| 71 | Household composition (Single parent)                              | 0.633 | 0.090     | 0.001 | (0.479, 0.837) | Household composition (Single parent)                              | 0.893                        | 0.047 | 0.030     | (0.805, 0.989) |        |   |
| 72 | Household composition (Multi-person without children)              | 0.769 | 0.031     | 0.000 | (0.712, 0.832) | Household composition (Multi-person without children)              | 0.847                        | 0.016 | 0.000     | (0.816, 0.879) |        |   |
| 73 | Household composition (Multi-person with children)                 | 0.613 | 0.028     | 0.000 | (0.560, 0.671) | Household composition (Multi-person with children)                 | 0.799                        | 0.017 | 0.000     | (0.767, 0.833) |        |   |
| 74 | Neighbourhood SES Index of Advantage/Disadvantage (2nd decile)     | 0.983 | 0.085     | 0.844 | (0.830, 1.165) | Neighbourhood SES Index of Advantage/Disadvantage (2nd decile)     | 1.041                        | 0.039 | 0.282     | (0.967, 1.122) |        |   |
| 75 | Neighbourhood SES Index of Advantage/Disadvantage (3rd decile)     | 0.934 | 0.077     | 0.409 | (0.794, 1.098) | Neighbourhood SES Index of Advantage/Disadvantage (3rd decile)     | 1.050                        | 0.038 | 0.173     | (0.979, 1.127) |        |   |
| 76 | Neighbourhood SES Index of Advantage/Disadvantage (4th decile)     | 0.989 | 0.081     | 0.897 | (0.842, 1.162) | Neighbourhood SES Index of Advantage/Disadvantage (4th decile)     | 1.054                        | 0.038 | 0.145     | (0.982, 1.132) |        |   |
| 77 | Neighbourhood SES Index of Advantage/Disadvantage (5th decile)     | 0.880 | 0.072     | 0.116 | (0.751, 1.032) | Neighbourhood SES Index of Advantage/Disadvantage (5th decile)     | 1.011                        | 0.036 | 0.766     | (0.942, 1.085) |        |   |
| 78 | Neighbourhood SES Index of Advantage/Disadvantage (6th decile)     | 0.958 | 0.078     | 0.597 | (0.817, 1.123) | Neighbourhood SES Index of Advantage/Disadvantage (6th decile)     | 1.051                        | 0.038 | 0.167     | (0.979, 1.128) |        |   |
| 79 | Neighbourhood SES Index of Advantage/Disadvantage (7th decile)     | 0.921 | 0.073     | 0.300 | (0.789, 1.076) | Neighbourhood SES Index of Advantage/Disadvantage (7th decile)     | 1.089                        | 0.038 | 0.016     | (1.016, 1.167) |        |   |
| 80 | Neighbourhood SES Index of Advantage/Disadvantage (8th decile)     | 0.993 | 0.079     | 0.933 | (0.851, 1.160) | Neighbourhood SES Index of Advantage/Disadvantage (8th decile)     | 1.115                        | 0.039 | 0.002     | (1.041, 1.195) |        |   |
| 81 | Neighbourhood SES Index of Advantage/Disadvantage (9th decile)     | 1.082 | 0.084     | 0.311 | (0.929, 1.259) | Neighbourhood SES Index of Advantage/Disadvantage (9th decile)     | 1.181                        | 0.042 | 0.000     | (1.103, 1.266) |        |   |
| 82 | Neighbourhood SES Index of Advantage/Disadvantage (Highest decile) | 1.267 | 0.099     | 0.002 | (1.087, 1.476) | Neighbourhood SES Index of Advantage/Disadvantage (Highest decile) | 1.318                        | 0.046 | 0.000     | (1.230, 1.412) |        |   |
| 83 | Remoteness (Inner Regional Australia)                              | 0.725 | 0.035     | 0.000 | (0.659, 0.798) | Remoteness (Inner Regional Australia)                              | 0.847                        | 0.018 | 0.000     | (0.812, 0.884) |        |   |
| 84 | Remoteness (Outer Regional Australia)                              | 0.777 | 0.045     | 0.000 | (0.694, 0.871) | Remoteness (Outer Regional Australia)                              | 0.828                        | 0.025 | 0.000     | (0.781, 0.878) |        |   |
| 85 | Remoteness (Remote or very remote Australia)                       | 0.706 | 0.095     | 0.010 | (0.542, 0.920) | Remoteness (Remote or very remote Australia)                       | 0.684                        | 0.049 | 0.000     | (0.594, 0.787) |        |   |
| 86 | Schedule (Other)                                                   | 0.926 | 0.031     | 0.022 | (0.867, 0.989) | Schedule (Other)                                                   | 0.937                        | 0.014 | 0.000     | (0.909, 0.965) |        |   |
| 87 | Tertiary education                                                 | 1.009 | 0.035     | 0.791 | (0.943, 1.080) | Tertiary education                                                 | 1.028                        | 0.019 | 0.135     | (0.992, 1.065) |        |   |
| 88 | Random intercept                                                   | 1.574 | 0.044     |       | (1.490, 1.663) | Random intercept                                                   | 0.539                        | 0.012 |           | (0.515, 0.563) |        |   |
| 89 |                                                                    |       |           |       |                |                                                                    |                              |       |           |                |        |   |
| 90 |                                                                    |       |           |       |                |                                                                    |                              |       |           |                |        |   |
| 91 |                                                                    |       |           |       |                |                                                                    |                              |       |           |                |        |   |
| 92 |                                                                    |       |           |       |                |                                                                    |                              |       |           |                |        |   |
| 93 |                                                                    |       |           |       |                |                                                                    |                              |       |           |                |        |   |
| 94 |                                                                    |       |           |       |                |                                                                    |                              |       |           |                |        |   |
| 95 |                                                                    |       |           |       |                |                                                                    |                              |       |           |                |        |   |
| 96 |                                                                    |       |           |       |                |                                                                    |                              |       |           |                |        |   |
| 97 |                                                                    |       |           |       |                |                                                                    |                              |       |           |                |        |   |
| 98 |                                                                    |       |           |       |                |                                                                    |                              |       |           |                |        |   |



|    | M                                                              | N     | O         | P     | Q              | R | S                             | T     | U         | V     | W              | X |
|----|----------------------------------------------------------------|-------|-----------|-------|----------------|---|-------------------------------|-------|-----------|-------|----------------|---|
| 65 |                                                                |       |           |       |                |   |                               |       |           |       |                |   |
| 66 | DINNER (mixed effects)                                         |       |           |       |                |   | EAT OUT TOTAL (mixed effects) |       |           |       |                |   |
| 67 |                                                                | IRR   | Robust SE | p     | 95% CI         |   |                               | Coef. | Robust SE | p     | 95% CI         |   |
| 68 | Combined work hours and commute time                           | 1.007 | 0.000     | 0.000 | (1.006, 1.008) |   | Combined work hours ar        | 1.008 | 0.000     | 0.000 | (1.007, 1.009) |   |
| 69 | Age (Years)                                                    | 0.982 | 0.000     | 0.000 | (0.981, 0.983) |   | Age (Years)                   | 0.978 | 0.000     | 0.000 | (0.977, 0.979) |   |
| 70 | Sex (Female)                                                   | 0.911 | 0.012     | 0.000 | (0.887, 0.936) |   | Sex (Female)                  | 0.799 | 0.011     | 0.000 | (0.777, 0.821) |   |
| 71 | Household composition (Single parent)                          | 0.874 | 0.039     | 0.003 | (0.800, 0.955) |   | Household composition         | 0.848 | 0.033     | 0.000 | (0.785, 0.916) |   |
| 72 | Household composition (Multi-person without children)          | 0.823 | 0.015     | 0.000 | (0.795, 0.852) |   | Household composition         | 0.837 | 0.013     | 0.000 | (0.811, 0.863) |   |
| 73 | Household composition (Multi-person with children)             | 0.689 | 0.013     | 0.000 | (0.664, 0.716) |   | Household composition         | 0.750 | 0.013     | 0.000 | (0.725, 0.777) |   |
| 74 | Neighbourhood SES Index of Advantage/Disadvantage (2nd decile) | 0.996 | 0.033     | 0.902 | (0.934, 1.062) |   | Neighbourhood SES Inde        | 1.021 | 0.034     | 0.536 | (0.957, 1.089) |   |
| 75 | Neighbourhood SES Index of Advantage/Disadvantage (3rd decile) | 0.978 | 0.032     | 0.491 | (0.917, 1.042) |   | Neighbourhood SES Inde        | 1.019 | 0.031     | 0.546 | (0.960, 1.081) |   |
| 76 | Neighbourhood SES Index of Advantage/Disadvantage (4th decile) | 0.969 | 0.031     | 0.331 | (0.910, 1.032) |   | Neighbourhood SES Inde        | 1.020 | 0.031     | 0.509 | (0.961, 1.083) |   |
| 77 | Neighbourhood SES Index of Advantage/Disadvantage (5th decile) | 0.971 | 0.030     | 0.336 | (0.913, 1.031) |   | Neighbourhood SES Inde        | 0.979 | 0.029     | 0.484 | (0.923, 1.039) |   |
| 78 | Neighbourhood SES Index of Advantage/Disadvantage (6th decile) | 1.039 | 0.032     | 0.209 | (0.979, 1.103) |   | Neighbourhood SES Inde        | 1.036 | 0.031     | 0.227 | (0.978, 1.098) |   |
| 79 | Neighbourhood SES Index of Advantage/Disadvantage (7th decile) | 0.968 | 0.030     | 0.283 | (0.911, 1.028) |   | Neighbourhood SES Inde        | 1.025 | 0.030     | 0.398 | (0.968, 1.086) |   |
| 80 | Neighbourhood SES Index of Advantage/Disadvantage (8th decile) | 1.017 | 0.031     | 0.580 | (0.958, 1.080) |   | Neighbourhood SES Inde        | 1.058 | 0.031     | 0.055 | (0.999, 1.120) |   |
| 81 | Neighbourhood SES Index of Advantage/Disadvantage (9th decile) | 1.015 | 0.031     | 0.631 | (0.955, 1.078) |   | Neighbourhood SES Inde        | 1.096 | 0.032     | 0.002 | (1.035, 1.162) |   |
| 82 | Neighbourhood SES Index of Advantage/Disadvantage (Highest de  | 1.106 | 0.033     | 0.001 | (1.043, 1.173) |   | Neighbourhood SES Inde        | 1.208 | 0.036     | 0.000 | (1.140, 1.280) |   |
| 83 | Remoteness (Inner Regional Australia)                          | 0.778 | 0.014     | 0.000 | (0.750, 0.807) |   | Remoteness (Inner Regio       | 0.813 | 0.015     | 0.000 | (0.785, 0.842) |   |
| 84 | Remoteness (Outer Regional Australia)                          | 0.749 | 0.019     | 0.000 | (0.712, 0.787) |   | Remoteness (Outer Regio       | 0.791 | 0.019     | 0.000 | (0.754, 0.829) |   |
| 85 | Remoteness (Remote or very remote Australia)                   | 0.599 | 0.037     | 0.000 | (0.531, 0.677) |   | Remoteness (Remote or v       | 0.659 | 0.039     | 0.000 | (0.586, 0.740) |   |
| 86 | Schedule (Other)                                               | 1.070 | 0.015     | 0.000 | (1.041, 1.099) |   | Schedule (Other)              | 0.977 | 0.012     | 0.058 | (0.953, 1.001) |   |
| 87 | Tertiary education                                             | 1.032 | 0.015     | 0.027 | (1.004, 1.061) |   | Tertiary education            | 1.027 | 0.015     | 0.062 | (0.999, 1.057) |   |
| 88 | Random intercept                                               | 0.129 | 0.007     |       | (0.116, 0.143) |   | Random intercept              | 0.414 | 0.008     |       | (0.398, 0.431) |   |
| 89 |                                                                |       |           |       |                |   |                               |       |           |       |                |   |
| 90 |                                                                |       |           |       |                |   |                               |       |           |       |                |   |
| 91 |                                                                |       |           |       |                |   |                               |       |           |       |                |   |
| 92 |                                                                |       |           |       |                |   |                               |       |           |       |                |   |
| 93 |                                                                |       |           |       |                |   |                               |       |           |       |                |   |
| 94 |                                                                |       |           |       |                |   |                               |       |           |       |                |   |
| 95 |                                                                |       |           |       |                |   |                               |       |           |       |                |   |
| 96 |                                                                |       |           |       |                |   |                               |       |           |       |                |   |
| 97 |                                                                |       |           |       |                |   |                               |       |           |       |                |   |
| 98 |                                                                |       |           |       |                |   |                               |       |           |       |                |   |



|    | Y                                                                  | Z      | AA        | AB    | AC               | AD | AE                         | AF     | AG        | AH    | AI               |
|----|--------------------------------------------------------------------|--------|-----------|-------|------------------|----|----------------------------|--------|-----------|-------|------------------|
| 65 |                                                                    |        |           |       |                  |    |                            |        |           |       |                  |
| 66 | FRUIT (mixed effects)                                              |        |           |       |                  |    | VEGETABLES (mixed effects) |        |           |       |                  |
| 67 |                                                                    | Coef.  | Robust SE | p     | 95% CI           |    |                            | Coef.  | Robust SE | p     | 95% CI           |
| 68 | Combined work hours and commute time                               | -0.002 | 0.000     | 0.000 | (-0.003, -0.001) |    | Combined work hours and    | -0.002 | 0.000     | 0.001 | (-0.003, -0.001) |
| 69 | Age (Years)                                                        | 0.007  | 0.001     | 0.000 | (0.006, 0.008)   |    | Age (Years)                | 0.014  | 0.001     | 0.000 | (0.013, 0.015)   |
| 70 | Sex (Female)                                                       | 0.187  | 0.016     | 0.000 | (0.155, 0.220)   |    | Sex (Female)               | 0.301  | 0.019     | 0.000 | (0.264, 0.339)   |
| 71 | Household composition (Single parent)                              | -0.069 | 0.052     | 0.184 | (-0.170, 0.033)  |    | Household composition (S   | 0.113  | 0.063     | 0.072 | (-0.010, 0.236)  |
| 72 | Household composition (Multi-person without children)              | -0.081 | 0.020     | 0.000 | (-0.120, -0.043) |    | Household composition (N   | 0.117  | 0.025     | 0.000 | (0.069, 0.165)   |
| 73 | Household composition (Multi-person with children)                 | -0.072 | 0.021     | 0.001 | (-0.114, -0.030) |    | Household composition (N   | 0.138  | 0.026     | 0.000 | (0.086, 0.189)   |
| 74 | Neighbourhood SES Index of Advantage/Disadvantage (2nd decile)     | 0.011  | 0.033     | 0.740 | (-0.053, 0.075)  |    | Neighbourhood SES Index    | 0.091  | 0.039     | 0.021 | (0.014, 0.167)   |
| 75 | Neighbourhood SES Index of Advantage/Disadvantage (3rd decile)     | 0.055  | 0.033     | 0.091 | (-0.009, 0.119)  |    | Neighbourhood SES Index    | 0.075  | 0.039     | 0.052 | (-0.001, 0.151)  |
| 76 | Neighbourhood SES Index of Advantage/Disadvantage (4th decile)     | 0.060  | 0.033     | 0.070 | (-0.005, 0.124)  |    | Neighbourhood SES Index    | 0.107  | 0.039     | 0.005 | (0.032, 0.183)   |
| 77 | Neighbourhood SES Index of Advantage/Disadvantage (5th decile)     | 0.095  | 0.032     | 0.003 | (0.032, 0.158)   |    | Neighbourhood SES Index    | 0.127  | 0.038     | 0.001 | (0.053, 0.202)   |
| 78 | Neighbourhood SES Index of Advantage/Disadvantage (6th decile)     | 0.116  | 0.033     | 0.000 | (0.052, 0.180)   |    | Neighbourhood SES Index    | 0.132  | 0.038     | 0.001 | (0.057, 0.207)   |
| 79 | Neighbourhood SES Index of Advantage/Disadvantage (7th decile)     | 0.157  | 0.034     | 0.000 | (0.091, 0.223)   |    | Neighbourhood SES Index    | 0.169  | 0.038     | 0.000 | (0.094, 0.244)   |
| 80 | Neighbourhood SES Index of Advantage/Disadvantage (8th decile)     | 0.195  | 0.033     | 0.000 | (0.130, 0.260)   |    | Neighbourhood SES Index    | 0.222  | 0.038     | 0.000 | (0.148, 0.297)   |
| 81 | Neighbourhood SES Index of Advantage/Disadvantage (9th decile)     | 0.170  | 0.033     | 0.000 | (0.106, 0.234)   |    | Neighbourhood SES Index    | 0.270  | 0.039     | 0.000 | (0.193, 0.346)   |
| 82 | Neighbourhood SES Index of Advantage/Disadvantage (Highest decile) | 0.229  | 0.034     | 0.000 | (0.162, 0.296)   |    | Neighbourhood SES Index    | 0.331  | 0.040     | 0.000 | (0.253, 0.409)   |
| 83 | Remoteness (Inner Regional Australia)                              | 0.013  | 0.020     | 0.503 | (-0.025, 0.052)  |    | Remoteness (Inner Regiona  | 0.301  | 0.023     | 0.000 | (0.257, 0.345)   |
| 84 | Remoteness (Outer Regional Australia)                              | -0.035 | 0.026     | 0.185 | (-0.086, 0.017)  |    | Remoteness (Outer Region   | 0.327  | 0.031     | 0.000 | (0.266, 0.389)   |
| 85 | Remoteness (Remote or very remote Australia)                       | -0.018 | 0.055     | 0.744 | (-0.125, 0.090)  |    | Remoteness (Remote or ve   | 0.342  | 0.068     | 0.000 | (0.209, 0.475)   |
| 86 | Schedule (Other)                                                   | 0.010  | 0.015     | 0.506 | (-0.019, 0.038)  |    | Schedule (Other)           | -0.015 | 0.017     | 0.373 | (-0.049, 0.019)  |
| 87 | Tertiary education                                                 | 0.138  | 0.017     | 0.000 | (0.104, 0.171)   |    | Tertiary education         | 0.225  | 0.020     | 0.000 | (0.186, 0.265)   |
| 88 | Random intercept                                                   | 0.59   | 0.01      |       | (0.57, 0.62)     |    | Random intercept           | 0.68   | 0.02      |       | (0.65, 0.71)     |
| 89 | Residual                                                           | 0.56   | 0.01      |       | (0.54, 0.58)     |    | Residual                   | 0.88   | 0.01      |       | (0.86, 0.91)     |
| 90 |                                                                    |        |           |       |                  |    |                            |        |           |       |                  |
| 91 |                                                                    |        |           |       |                  |    |                            |        |           |       |                  |
| 92 |                                                                    |        |           |       |                  |    |                            |        |           |       |                  |
| 93 |                                                                    |        |           |       |                  |    |                            |        |           |       |                  |
| 94 |                                                                    |        |           |       |                  |    |                            |        |           |       |                  |
| 95 |                                                                    |        |           |       |                  |    |                            |        |           |       |                  |
| 96 |                                                                    |        |           |       |                  |    |                            |        |           |       |                  |
| 97 |                                                                    |        |           |       |                  |    |                            |        |           |       |                  |
| 98 |                                                                    |        |           |       |                  |    |                            |        |           |       |                  |

|     | A                                                                                                                                                                                                                                                                                                                   | B     | C         | D     | E              | F                                            | G                            | H     | I         | J     | K              | L |  |
|-----|---------------------------------------------------------------------------------------------------------------------------------------------------------------------------------------------------------------------------------------------------------------------------------------------------------------------|-------|-----------|-------|----------------|----------------------------------------------|------------------------------|-------|-----------|-------|----------------|---|--|
| 99  | <b>Analysis:</b> Fixed effects models with robust standard errors were fitted to examine whether change in each exposure was associated with change in each of the food practices, again using Poisson models for the out-of-home food purchasing outcomes and linear models for the fruit and vegetables outcomes. |       |           |       |                |                                              |                              |       |           |       |                |   |  |
| 100 | <b>Weekly frequency of out-of-home food purchasing:</b> How often in a usual week do you buy breakfast/lunch/dinner/total from a restaurant, café, fast food outlet, or any other place that prepares and sells meals?                                                                                              |       |           |       |                |                                              |                              |       |           |       |                |   |  |
| 101 | <b>Daily average fruit intake:</b> Including tinned, frozen, dried and fresh fruit, on how many days in a usual week do you eat fruit? On a day when you eat fruit, how many serves of fruit do you usually eat? Daily average (days*servings)/7                                                                    |       |           |       |                |                                              |                              |       |           |       |                |   |  |
| 102 | <b>Daily average vegetables intake:</b> Including tinned, frozen and fresh vegetables, on how many days in a usual week do you eat vegetables? On a day when you eat vegetables, how many serves of vegetables do you usually eat? Daily average (days*servings)/7                                                  |       |           |       |                |                                              |                              |       |           |       |                |   |  |
| 103 |                                                                                                                                                                                                                                                                                                                     |       |           |       |                |                                              |                              |       |           |       |                |   |  |
| 104 | Adjusted for confounders: Age, sex (omitted because does not change), education, household composition, remoteness, neighbourhood SES, work schedule                                                                                                                                                                |       |           |       |                |                                              |                              |       |           |       |                |   |  |
| 105 | <b>WORK HOURS ANALYSIS</b>                                                                                                                                                                                                                                                                                          |       |           |       |                |                                              |                              |       |           |       |                |   |  |
| 106 | <b>BREAKFAST (fixed effects)</b>                                                                                                                                                                                                                                                                                    |       |           |       |                |                                              | <b>LUNCH (fixed effects)</b> |       |           |       |                |   |  |
| 107 |                                                                                                                                                                                                                                                                                                                     | IRR   | Robust SE | p     | 95% CI         |                                              |                              | IRR   | Robust SE | p     | 95% CI         |   |  |
| 108 | Work hours                                                                                                                                                                                                                                                                                                          | 1.010 | 0.002     | 0.000 | (1.007, 1.013) | Work hours                                   |                              | 1.005 | 0.001     | 0.000 | (1.004, 1.007) |   |  |
| 109 | Age (Years)                                                                                                                                                                                                                                                                                                         | 1.001 | 0.004     | 0.846 | (0.993, 1.009) | Age (Years)                                  |                              | 0.978 | 0.002     | 0.000 | (0.975, 0.982) |   |  |
| 110 | Sex (Female)                                                                                                                                                                                                                                                                                                        | 1.000 | .         | .     | (. , .)        | Sex (Female)                                 |                              | 1.000 | .         | .     | (. , .)        |   |  |
| 111 | Household composition (Single parent)                                                                                                                                                                                                                                                                               | 0.666 | 0.132     | 0.040 | (0.451, 0.982) | Household composition                        |                              | 0.925 | 0.062     | 0.247 | (0.811, 1.056) |   |  |
| 112 | Household composition (Multi-person without children)                                                                                                                                                                                                                                                               | 0.826 | 0.047     | 0.001 | (0.739, 0.924) | Household composition                        |                              | 0.878 | 0.022     | 0.000 | (0.836, 0.921) |   |  |
| 113 | Household composition (Multi-person with children)                                                                                                                                                                                                                                                                  | 0.674 | 0.046     | 0.000 | (0.589, 0.771) | Household composition                        |                              | 0.849 | 0.024     | 0.000 | (0.803, 0.897) |   |  |
| 114 | Neighbourhood SES Index of Advantage/Disadvantage (2nd decile)                                                                                                                                                                                                                                                      | 0.903 | 0.137     | 0.503 | (0.671, 1.217) | Neighbourhood SES Index                      |                              | 1.057 | 0.062     | 0.344 | (0.942, 1.187) |   |  |
| 115 | Neighbourhood SES Index of Advantage/Disadvantage (3rd decile)                                                                                                                                                                                                                                                      | 0.982 | 0.139     | 0.895 | (0.744, 1.294) | Neighbourhood SES Index                      |                              | 1.006 | 0.054     | 0.915 | (0.905, 1.118) |   |  |
| 116 | Neighbourhood SES Index of Advantage/Disadvantage (4th decile)                                                                                                                                                                                                                                                      | 0.934 | 0.134     | 0.635 | (0.706, 1.237) | Neighbourhood SES Index                      |                              | 1.072 | 0.058     | 0.200 | (0.964, 1.193) |   |  |
| 117 | Neighbourhood SES Index of Advantage/Disadvantage (5th decile)                                                                                                                                                                                                                                                      | 0.868 | 0.119     | 0.305 | (0.663, 1.137) | Neighbourhood SES Index                      |                              | 1.017 | 0.056     | 0.767 | (0.912, 1.133) |   |  |
| 118 | Neighbourhood SES Index of Advantage/Disadvantage (6th decile)                                                                                                                                                                                                                                                      | 0.813 | 0.115     | 0.142 | (0.617, 1.072) | Neighbourhood SES Index                      |                              | 1.008 | 0.056     | 0.883 | (0.904, 1.125) |   |  |
| 119 | Neighbourhood SES Index of Advantage/Disadvantage (7th decile)                                                                                                                                                                                                                                                      | 0.834 | 0.113     | 0.180 | (0.640, 1.087) | Neighbourhood SES Index                      |                              | 0.970 | 0.053     | 0.568 | (0.872, 1.078) |   |  |
| 120 | Neighbourhood SES Index of Advantage/Disadvantage (8th decile)                                                                                                                                                                                                                                                      | 0.839 | 0.117     | 0.210 | (0.638, 1.104) | Neighbourhood SES Index                      |                              | 0.995 | 0.054     | 0.922 | (0.895, 1.106) |   |  |
| 121 | Neighbourhood SES Index of Advantage/Disadvantage (9th decile)                                                                                                                                                                                                                                                      | 0.880 | 0.121     | 0.352 | (0.673, 1.152) | Neighbourhood SES Index                      |                              | 1.012 | 0.056     | 0.831 | (0.908, 1.127) |   |  |
| 122 | Neighbourhood SES Index of Advantage/Disadvantage (Highest decile)                                                                                                                                                                                                                                                  | 0.917 | 0.129     | 0.540 | (0.696, 1.209) | Neighbourhood SES Index                      |                              | 1.042 | 0.058     | 0.465 | (0.934, 1.162) |   |  |
| 123 | Remoteness (Inner Regional Australia)                                                                                                                                                                                                                                                                               | 0.980 | 0.101     | 0.842 | (0.800, 1.199) | Remoteness (Inner Regional Australia)        |                              | 0.951 | 0.038     | 0.207 | (0.879, 1.028) |   |  |
| 124 | Remoteness (Outer Regional Australia)                                                                                                                                                                                                                                                                               | 0.914 | 0.104     | 0.432 | (0.731, 1.144) | Remoteness (Outer Regional Australia)        |                              | 0.835 | 0.050     | 0.003 | (0.742, 0.939) |   |  |
| 125 | Remoteness (Remote or very remote Australia)                                                                                                                                                                                                                                                                        | 0.705 | 0.173     | 0.155 | (0.435, 1.141) | Remoteness (Remote or very remote Australia) |                              | 0.906 | 0.109     | 0.412 | (0.716, 1.147) |   |  |
| 126 | Schedule (Other)                                                                                                                                                                                                                                                                                                    | 0.876 | 0.041     | 0.005 | (0.798, 0.961) | Schedule (Other)                             |                              | 0.958 | 0.019     | 0.032 | (0.921, 0.996) |   |  |
| 127 | Tertiary education                                                                                                                                                                                                                                                                                                  | 1.072 | 0.097     | 0.446 | (0.897, 1.280) | Tertiary education                           |                              | 0.862 | 0.036     | 0.000 | (0.794, 0.936) |   |  |
| 128 |                                                                                                                                                                                                                                                                                                                     |       |           |       |                |                                              |                              |       |           |       |                |   |  |
| 129 |                                                                                                                                                                                                                                                                                                                     |       |           |       |                |                                              |                              |       |           |       |                |   |  |

|     | M                                                                  | N     | O         | P     | Q              | R | S                                            | T     | U         | V     | W              | X |
|-----|--------------------------------------------------------------------|-------|-----------|-------|----------------|---|----------------------------------------------|-------|-----------|-------|----------------|---|
| 99  |                                                                    |       |           |       |                |   |                                              |       |           |       |                |   |
| 100 |                                                                    |       |           |       |                |   |                                              |       |           |       |                |   |
| 101 |                                                                    |       |           |       |                |   |                                              |       |           |       |                |   |
| 102 |                                                                    |       |           |       |                |   |                                              |       |           |       |                |   |
| 103 |                                                                    |       |           |       |                |   |                                              |       |           |       |                |   |
| 104 |                                                                    |       |           |       |                |   |                                              |       |           |       |                |   |
| 105 |                                                                    |       |           |       |                |   |                                              |       |           |       |                |   |
| 106 | DINNER (fixed effects)                                             |       |           |       |                |   | EAT OUT TOTAL (fixed effects)                |       |           |       |                |   |
| 107 |                                                                    | IRR   | Robust SE | p     | 95% CI         |   |                                              | IRR   | Robust SE | p     | 95% CI         |   |
| 108 | Work hours                                                         | 1.006 | 0.001     | 0.000 | (1.005, 1.007) |   | Work hours                                   | 1.006 | 0.001     | 0.000 | (1.005, 1.007) |   |
| 109 | Age (Years)                                                        | 0.990 | 0.001     | 0.000 | (0.988, 0.993) |   | Age (Years)                                  | 0.986 | 0.001     | 0.000 | (0.983, 0.988) |   |
| 110 | Sex (Female)                                                       | 1.000 | .         | .     | (., .)         |   | Sex (Female)                                 | 1.000 | .         | .     | (., .)         |   |
| 111 | Household composition (Single parent)                              | 0.792 | 0.048     | 0.000 | (0.704, 0.892) |   | Household composition                        | 0.841 | 0.045     | 0.001 | (0.758, 0.933) |   |
| 112 | Household composition (Multi-person without children)              | 0.835 | 0.020     | 0.000 | (0.796, 0.875) |   | Household composition                        | 0.855 | 0.017     | 0.000 | (0.822, 0.890) |   |
| 113 | Household composition (Multi-person with children)                 | 0.720 | 0.020     | 0.000 | (0.682, 0.761) |   | Household composition                        | 0.778 | 0.018     | 0.000 | (0.743, 0.815) |   |
| 114 | Neighbourhood SES Index of Advantage/Disadvantage (2nd decile)     | 1.022 | 0.058     | 0.709 | (0.913, 1.142) |   | Neighbourhood SES Index                      | 1.017 | 0.053     | 0.739 | (0.919, 1.127) |   |
| 115 | Neighbourhood SES Index of Advantage/Disadvantage (3rd decile)     | 1.055 | 0.056     | 0.314 | (0.951, 1.171) |   | Neighbourhood SES Index                      | 1.014 | 0.046     | 0.757 | (0.928, 1.109) |   |
| 116 | Neighbourhood SES Index of Advantage/Disadvantage (4th decile)     | 1.019 | 0.055     | 0.729 | (0.917, 1.133) |   | Neighbourhood SES Index                      | 1.028 | 0.048     | 0.554 | (0.938, 1.127) |   |
| 117 | Neighbourhood SES Index of Advantage/Disadvantage (5th decile)     | 0.976 | 0.051     | 0.642 | (0.881, 1.081) |   | Neighbourhood SES Index                      | 0.976 | 0.045     | 0.595 | (0.892, 1.068) |   |
| 118 | Neighbourhood SES Index of Advantage/Disadvantage (6th decile)     | 1.034 | 0.053     | 0.520 | (0.935, 1.143) |   | Neighbourhood SES Index                      | 0.984 | 0.044     | 0.723 | (0.901, 1.075) |   |
| 119 | Neighbourhood SES Index of Advantage/Disadvantage (7th decile)     | 1.003 | 0.052     | 0.955 | (0.906, 1.111) |   | Neighbourhood SES Index                      | 0.956 | 0.043     | 0.323 | (0.876, 1.045) |   |
| 120 | Neighbourhood SES Index of Advantage/Disadvantage (8th decile)     | 1.035 | 0.054     | 0.503 | (0.935, 1.146) |   | Neighbourhood SES Index                      | 0.981 | 0.044     | 0.669 | (0.898, 1.072) |   |
| 121 | Neighbourhood SES Index of Advantage/Disadvantage (9th decile)     | 1.046 | 0.057     | 0.403 | (0.941, 1.163) |   | Neighbourhood SES Index                      | 1.000 | 0.046     | 0.998 | (0.914, 1.095) |   |
| 122 | Neighbourhood SES Index of Advantage/Disadvantage (Highest decile) | 1.105 | 0.060     | 0.064 | (0.994, 1.228) |   | Neighbourhood SES Index                      | 1.040 | 0.049     | 0.403 | (0.949, 1.141) |   |
| 123 | Remoteness (Inner Regional Australia)                              | 0.883 | 0.036     | 0.002 | (0.816, 0.957) |   | Remoteness (Inner Regional Australia)        | 0.930 | 0.032     | 0.033 | (0.871, 0.994) |   |
| 124 | Remoteness (Outer Regional Australia)                              | 0.854 | 0.048     | 0.005 | (0.765, 0.954) |   | Remoteness (Outer Regional Australia)        | 0.854 | 0.039     | 0.001 | (0.781, 0.935) |   |
| 125 | Remoteness (Remote or very remote Australia)                       | 0.707 | 0.076     | 0.001 | (0.574, 0.872) |   | Remoteness (Remote or very remote Australia) | 0.804 | 0.080     | 0.029 | (0.661, 0.978) |   |
| 126 | Schedule (Other)                                                   | 1.049 | 0.020     | 0.015 | (1.009, 1.089) |   | Schedule (Other)                             | 0.978 | 0.016     | 0.169 | (0.947, 1.009) |   |
| 127 | Tertiary education                                                 | 1.095 | 0.045     | 0.028 | (1.010, 1.187) |   | Tertiary education                           | 0.965 | 0.033     | 0.288 | (0.903, 1.031) |   |
| 128 |                                                                    |       |           |       |                |   |                                              |       |           |       |                |   |
| 129 |                                                                    |       |           |       |                |   |                                              |       |           |       |                |   |

|     | Y                                                                  | Z      | AA        | AB    | AC               | AD | AE                         | AF     | AG        | AH    | AI              |
|-----|--------------------------------------------------------------------|--------|-----------|-------|------------------|----|----------------------------|--------|-----------|-------|-----------------|
| 99  |                                                                    |        |           |       |                  |    |                            |        |           |       |                 |
| 100 |                                                                    |        |           |       |                  |    |                            |        |           |       |                 |
| 101 |                                                                    |        |           |       |                  |    |                            |        |           |       |                 |
| 102 |                                                                    |        |           |       |                  |    |                            |        |           |       |                 |
| 103 |                                                                    |        |           |       |                  |    |                            |        |           |       |                 |
| 104 |                                                                    |        |           |       |                  |    |                            |        |           |       |                 |
| 105 |                                                                    |        |           |       |                  |    |                            |        |           |       |                 |
| 106 | FRUIT (fixed effects)                                              |        |           |       |                  |    | VEGETABLES (fixed effects) |        |           |       |                 |
| 107 |                                                                    | Coef.  | Robust SE | p     | 95% CI           |    |                            | Coef.  | Robust SE | p     | 95% CI          |
| 108 | Work hours                                                         | 0.000  | 0.001     | 0.977 | (-0.001, 0.001)  |    | Work hours                 | -0.000 | 0.001     | 0.675 | (-0.002, 0.001) |
| 109 | Age (Years)                                                        | 0.001  | 0.002     | 0.401 | (-0.002, 0.004)  |    | Age (Years)                | 0.006  | 0.002     | 0.001 | (0.003, 0.010)  |
| 110 | Sex (Female)                                                       | 0.000  | .         | .     | (., .)           |    | Sex (Female)               | 0.000  | .         | .     | (., .)          |
| 111 | Household composition (Single parent)                              | 0.029  | 0.062     | 0.641 | (-0.092, 0.150)  |    | Household composition (S   | 0.247  | 0.085     | 0.004 | (0.081, 0.413)  |
| 112 | Household composition (Multi-person without children)              | -0.077 | 0.026     | 0.004 | (-0.128, -0.025) |    | Household composition (N   | 0.112  | 0.034     | 0.001 | (0.045, 0.178)  |
| 113 | Household composition (Multi-person with children)                 | -0.050 | 0.029     | 0.089 | (-0.107, 0.008)  |    | Household composition (N   | 0.197  | 0.037     | 0.000 | (0.124, 0.269)  |
| 114 | Neighbourhood SES Index of Advantage/Disadvantage (2nd decile)     | -0.040 | 0.049     | 0.414 | (-0.137, 0.056)  |    | Neighbourhood SES Index    | 0.031  | 0.063     | 0.618 | (-0.092, 0.154) |
| 115 | Neighbourhood SES Index of Advantage/Disadvantage (3rd decile)     | -0.019 | 0.048     | 0.691 | (-0.112, 0.074)  |    | Neighbourhood SES Index    | -0.042 | 0.060     | 0.491 | (-0.160, 0.077) |
| 116 | Neighbourhood SES Index of Advantage/Disadvantage (4th decile)     | -0.031 | 0.048     | 0.523 | (-0.125, 0.064)  |    | Neighbourhood SES Index    | -0.015 | 0.061     | 0.806 | (-0.134, 0.104) |
| 117 | Neighbourhood SES Index of Advantage/Disadvantage (5th decile)     | -0.006 | 0.048     | 0.893 | (-0.101, 0.088)  |    | Neighbourhood SES Index    | 0.057  | 0.062     | 0.356 | (-0.065, 0.179) |
| 118 | Neighbourhood SES Index of Advantage/Disadvantage (6th decile)     | -0.007 | 0.048     | 0.889 | (-0.101, 0.088)  |    | Neighbourhood SES Index    | 0.039  | 0.061     | 0.522 | (-0.081, 0.159) |
| 119 | Neighbourhood SES Index of Advantage/Disadvantage (7th decile)     | 0.030  | 0.051     | 0.548 | (-0.069, 0.130)  |    | Neighbourhood SES Index    | 0.028  | 0.063     | 0.661 | (-0.096, 0.151) |
| 120 | Neighbourhood SES Index of Advantage/Disadvantage (8th decile)     | 0.015  | 0.050     | 0.768 | (-0.083, 0.113)  |    | Neighbourhood SES Index    | 0.059  | 0.064     | 0.356 | (-0.066, 0.183) |
| 121 | Neighbourhood SES Index of Advantage/Disadvantage (9th decile)     | -0.024 | 0.050     | 0.635 | (-0.122, 0.074)  |    | Neighbourhood SES Index    | -0.011 | 0.066     | 0.868 | (-0.139, 0.118) |
| 122 | Neighbourhood SES Index of Advantage/Disadvantage (Highest decile) | 0.008  | 0.055     | 0.887 | (-0.100, 0.115)  |    | Neighbourhood SES Index    | 0.015  | 0.072     | 0.830 | (-0.125, 0.156) |
| 123 | Remoteness (Inner Regional Australia)                              | -0.026 | 0.040     | 0.511 | (-0.104, 0.052)  |    | Remoteness (Inner Regional | 0.084  | 0.048     | 0.080 | (-0.010, 0.177) |
| 124 | Remoteness (Outer Regional Australia)                              | -0.030 | 0.054     | 0.583 | (-0.136, 0.077)  |    | Remoteness (Outer Regional | 0.213  | 0.072     | 0.003 | (0.073, 0.354)  |
| 125 | Remoteness (Remote or very remote Australia)                       | 0.101  | 0.092     | 0.273 | (-0.079, 0.281)  |    | Remoteness (Remote or ve   | 0.132  | 0.122     | 0.277 | (-0.106, 0.371) |
| 126 | Schedule (Other)                                                   | 0.033  | 0.019     | 0.085 | (-0.005, 0.071)  |    | Schedule (Other)           | -0.024 | 0.024     | 0.303 | (-0.071, 0.022) |
| 127 | Tertiary education                                                 | -0.043 | 0.043     | 0.324 | (-0.127, 0.042)  |    | Tertiary education         | 0.181  | 0.055     | 0.001 | (0.073, 0.289)  |
| 128 |                                                                    |        |           |       |                  |    |                            |        |           |       |                 |
| 129 |                                                                    |        |           |       |                  |    |                            |        |           |       |                 |

|     | A                                                                  | B     | C         | D     | E              | F                                            | G | H     | I         | J     | K              | L |
|-----|--------------------------------------------------------------------|-------|-----------|-------|----------------|----------------------------------------------|---|-------|-----------|-------|----------------|---|
| 130 |                                                                    |       |           |       |                |                                              |   |       |           |       |                |   |
| 131 |                                                                    |       |           |       |                |                                              |   |       |           |       |                |   |
| 132 | <b>COMMUTE TIME ANALYSIS</b>                                       |       |           |       |                |                                              |   |       |           |       |                |   |
| 133 | <b>BREAKFAST (fixed effects)</b>                                   |       |           |       |                | <b>LUNCH (fixed effects)</b>                 |   |       |           |       |                |   |
| 134 |                                                                    | IRR   | Robust SE | p     | 95% CI         |                                              |   | IRR   | Robust SE | p     | 95% CI         |   |
| 135 | Commute time (hours)                                               | 1.026 | 0.005     | 0.000 | (1.017, 1.036) | Commute time (hours)                         |   | 1.014 | 0.002     | 0.000 | (1.010, 1.018) |   |
| 136 | Age (Years)                                                        | 1.001 | 0.004     | 0.775 | (0.993, 1.009) | Age (Years)                                  |   | 0.978 | 0.002     | 0.000 | (0.975, 0.981) |   |
| 137 | Sex (Female)                                                       | 1.000 | .         | .     | (., .)         | Sex (Female)                                 |   | 1.000 | .         | .     | (., .)         |   |
| 138 | Household composition (Single parent)                              | 0.597 | 0.110     | 0.005 | (0.415, 0.857) | Household composition                        |   | 0.910 | 0.062     | 0.165 | (0.797, 1.039) |   |
| 139 | Household composition (Multi-person without children)              | 0.817 | 0.047     | 0.000 | (0.729, 0.915) | Household composition                        |   | 0.872 | 0.022     | 0.000 | (0.830, 0.915) |   |
| 140 | Household composition (Multi-person with children)                 | 0.651 | 0.045     | 0.000 | (0.568, 0.746) | Household composition                        |   | 0.831 | 0.024     | 0.000 | (0.786, 0.879) |   |
| 141 | Neighbourhood SES Index of Advantage/Disadvantage (2nd decile)     | 0.935 | 0.142     | 0.657 | (0.694, 1.259) | Neighbourhood SES Index                      |   | 1.058 | 0.062     | 0.336 | (0.943, 1.186) |   |
| 142 | Neighbourhood SES Index of Advantage/Disadvantage (3rd decile)     | 0.972 | 0.137     | 0.838 | (0.737, 1.280) | Neighbourhood SES Index                      |   | 1.005 | 0.054     | 0.930 | (0.904, 1.117) |   |
| 143 | Neighbourhood SES Index of Advantage/Disadvantage (4th decile)     | 0.950 | 0.137     | 0.721 | (0.717, 1.259) | Neighbourhood SES Index                      |   | 1.062 | 0.058     | 0.268 | (0.955, 1.182) |   |
| 144 | Neighbourhood SES Index of Advantage/Disadvantage (5th decile)     | 0.882 | 0.122     | 0.364 | (0.672, 1.157) | Neighbourhood SES Index                      |   | 1.001 | 0.055     | 0.985 | (0.899, 1.115) |   |
| 145 | Neighbourhood SES Index of Advantage/Disadvantage (6th decile)     | 0.840 | 0.121     | 0.224 | (0.634, 1.113) | Neighbourhood SES Index                      |   | 1.005 | 0.055     | 0.925 | (0.903, 1.119) |   |
| 146 | Neighbourhood SES Index of Advantage/Disadvantage (7th decile)     | 0.837 | 0.115     | 0.195 | (0.639, 1.096) | Neighbourhood SES Index                      |   | 0.968 | 0.052     | 0.550 | (0.872, 1.076) |   |
| 147 | Neighbourhood SES Index of Advantage/Disadvantage (8th decile)     | 0.847 | 0.120     | 0.239 | (0.642, 1.117) | Neighbourhood SES Index                      |   | 0.983 | 0.053     | 0.743 | (0.884, 1.092) |   |
| 148 | Neighbourhood SES Index of Advantage/Disadvantage (9th decile)     | 0.897 | 0.124     | 0.431 | (0.684, 1.176) | Neighbourhood SES Index                      |   | 1.008 | 0.055     | 0.890 | (0.905, 1.122) |   |
| 149 | Neighbourhood SES Index of Advantage/Disadvantage (Highest decile) | 0.949 | 0.134     | 0.709 | (0.719, 1.251) | Neighbourhood SES Index                      |   | 1.044 | 0.058     | 0.437 | (0.936, 1.164) |   |
| 150 | Remoteness (Inner Regional Australia)                              | 0.927 | 0.097     | 0.468 | (0.755, 1.137) | Remoteness (Inner Regional Australia)        |   | 0.944 | 0.038     | 0.155 | (0.872, 1.022) |   |
| 151 | Remoteness (Outer Regional Australia)                              | 0.964 | 0.107     | 0.741 | (0.776, 1.197) | Remoteness (Outer Regional Australia)        |   | 0.852 | 0.052     | 0.008 | (0.756, 0.960) |   |
| 152 | Remoteness (Remote or very remote Australia)                       | 0.740 | 0.177     | 0.209 | (0.464, 1.183) | Remoteness (Remote or very remote Australia) |   | 0.960 | 0.121     | 0.746 | (0.751, 1.228) |   |
| 153 | Schedule (Other)                                                   | 0.858 | 0.041     | 0.001 | (0.782, 0.942) | Schedule (Other)                             |   | 0.946 | 0.019     | 0.007 | (0.909, 0.985) |   |
| 154 | Tertiary education                                                 | 1.158 | 0.104     | 0.101 | (0.972, 1.380) | Tertiary education                           |   | 0.913 | 0.038     | 0.028 | (0.842, 0.990) |   |
| 155 |                                                                    |       |           |       |                |                                              |   |       |           |       |                |   |
| 156 |                                                                    |       |           |       |                |                                              |   |       |           |       |                |   |
| 157 |                                                                    |       |           |       |                |                                              |   |       |           |       |                |   |
| 158 |                                                                    |       |           |       |                |                                              |   |       |           |       |                |   |
| 159 |                                                                    |       |           |       |                |                                              |   |       |           |       |                |   |
| 160 |                                                                    |       |           |       |                |                                              |   |       |           |       |                |   |
| 161 |                                                                    |       |           |       |                |                                              |   |       |           |       |                |   |
| 162 |                                                                    |       |           |       |                |                                              |   |       |           |       |                |   |
| 163 |                                                                    |       |           |       |                |                                              |   |       |           |       |                |   |

|     | M                                                                  | N     | O         | P     | Q              | R                                            | S                             | T     | U         | V     | W              | X |
|-----|--------------------------------------------------------------------|-------|-----------|-------|----------------|----------------------------------------------|-------------------------------|-------|-----------|-------|----------------|---|
| 130 |                                                                    |       |           |       |                |                                              |                               |       |           |       |                |   |
| 131 |                                                                    |       |           |       |                |                                              |                               |       |           |       |                |   |
| 132 |                                                                    |       |           |       |                |                                              |                               |       |           |       |                |   |
| 133 | DINNER (fixed effects)                                             |       |           |       |                |                                              | EAT OUT TOTAL (fixed effects) |       |           |       |                |   |
| 134 |                                                                    | IRR   | Robust SE | p     | 95% CI         |                                              |                               | IRR   | Robust SE | p     | 95% CI         |   |
| 135 | Commute time (hours)                                               | 1.009 | 0.002     | 0.000 | (1.005, 1.013) | Commute time (hours)                         |                               | 1.014 | 0.002     | 0.000 | (1.011, 1.017) |   |
| 136 | Age (Years)                                                        | 0.990 | 0.002     | 0.000 | (0.987, 0.993) | Age (Years)                                  |                               | 0.985 | 0.001     | 0.000 | (0.983, 0.988) |   |
| 137 | Sex (Female)                                                       | 1.000 | .         | .     | (., .)         | Sex (Female)                                 |                               | 1.000 | .         | .     | (., .)         |   |
| 138 | Household composition (Single parent)                              | 0.761 | 0.047     | 0.000 | (0.675, 0.858) | Household composition                        |                               | 0.812 | 0.041     | 0.000 | (0.735, 0.897) |   |
| 139 | Household composition (Multi-person without children)              | 0.818 | 0.020     | 0.000 | (0.780, 0.858) | Household composition                        |                               | 0.845 | 0.017     | 0.000 | (0.811, 0.880) |   |
| 140 | Household composition (Multi-person with children)                 | 0.693 | 0.019     | 0.000 | (0.656, 0.731) | Household composition                        |                               | 0.756 | 0.018     | 0.000 | (0.722, 0.792) |   |
| 141 | Neighbourhood SES Index of Advantage/Disadvantage (2nd decile)     | 1.015 | 0.058     | 0.799 | (0.907, 1.136) | Neighbourhood SES Index                      |                               | 1.019 | 0.053     | 0.710 | (0.921, 1.129) |   |
| 142 | Neighbourhood SES Index of Advantage/Disadvantage (3rd decile)     | 1.062 | 0.057     | 0.263 | (0.956, 1.180) | Neighbourhood SES Index                      |                               | 1.015 | 0.047     | 0.741 | (0.927, 1.112) |   |
| 143 | Neighbourhood SES Index of Advantage/Disadvantage (4th decile)     | 1.019 | 0.056     | 0.727 | (0.916, 1.134) | Neighbourhood SES Index                      |                               | 1.025 | 0.048     | 0.594 | (0.935, 1.124) |   |
| 144 | Neighbourhood SES Index of Advantage/Disadvantage (5th decile)     | 0.981 | 0.052     | 0.716 | (0.884, 1.088) | Neighbourhood SES Index                      |                               | 0.971 | 0.045     | 0.530 | (0.886, 1.064) |   |
| 145 | Neighbourhood SES Index of Advantage/Disadvantage (6th decile)     | 1.033 | 0.053     | 0.524 | (0.934, 1.144) | Neighbourhood SES Index                      |                               | 0.987 | 0.045     | 0.767 | (0.902, 1.079) |   |
| 146 | Neighbourhood SES Index of Advantage/Disadvantage (7th decile)     | 1.012 | 0.053     | 0.815 | (0.913, 1.122) | Neighbourhood SES Index                      |                               | 0.960 | 0.044     | 0.365 | (0.878, 1.049) |   |
| 147 | Neighbourhood SES Index of Advantage/Disadvantage (8th decile)     | 1.040 | 0.055     | 0.455 | (0.938, 1.153) | Neighbourhood SES Index                      |                               | 0.977 | 0.045     | 0.614 | (0.893, 1.069) |   |
| 148 | Neighbourhood SES Index of Advantage/Disadvantage (9th decile)     | 1.048 | 0.057     | 0.388 | (0.942, 1.167) | Neighbourhood SES Index                      |                               | 1.002 | 0.047     | 0.972 | (0.914, 1.098) |   |
| 149 | Neighbourhood SES Index of Advantage/Disadvantage (Highest decile) | 1.121 | 0.061     | 0.036 | (1.007, 1.248) | Neighbourhood SES Index                      |                               | 1.051 | 0.050     | 0.298 | (0.957, 1.153) |   |
| 150 | Remoteness (Inner Regional Australia)                              | 0.881 | 0.036     | 0.002 | (0.813, 0.954) | Remoteness (Inner Regional Australia)        |                               | 0.920 | 0.032     | 0.015 | (0.860, 0.984) |   |
| 151 | Remoteness (Outer Regional Australia)                              | 0.889 | 0.048     | 0.030 | (0.799, 0.988) | Remoteness (Outer Regional Australia)        |                               | 0.881 | 0.040     | 0.005 | (0.806, 0.962) |   |
| 152 | Remoteness (Remote or very remote Australia)                       | 0.771 | 0.084     | 0.017 | (0.622, 0.955) | Remoteness (Remote or very remote Australia) |                               | 0.864 | 0.089     | 0.158 | (0.705, 1.059) |   |
| 153 | Schedule (Other)                                                   | 1.036 | 0.020     | 0.067 | (0.997, 1.077) | Schedule (Other)                             |                               | 0.965 | 0.016     | 0.032 | (0.934, 0.997) |   |
| 154 | Tertiary education                                                 | 1.180 | 0.048     | 0.000 | (1.089, 1.278) | Tertiary education                           |                               | 1.032 | 0.035     | 0.354 | (0.966, 1.102) |   |
| 155 |                                                                    |       |           |       |                |                                              |                               |       |           |       |                |   |
| 156 |                                                                    |       |           |       |                |                                              |                               |       |           |       |                |   |
| 157 |                                                                    |       |           |       |                |                                              |                               |       |           |       |                |   |
| 158 |                                                                    |       |           |       |                |                                              |                               |       |           |       |                |   |
| 159 |                                                                    |       |           |       |                |                                              |                               |       |           |       |                |   |
| 160 |                                                                    |       |           |       |                |                                              |                               |       |           |       |                |   |
| 161 |                                                                    |       |           |       |                |                                              |                               |       |           |       |                |   |
| 162 |                                                                    |       |           |       |                |                                              |                               |       |           |       |                |   |
| 163 |                                                                    |       |           |       |                |                                              |                               |       |           |       |                |   |

|     | Y                                                                  | Z      | AA        | AB    | AC               | AD | AE                         | AF     | AG        | AH    | AI              |
|-----|--------------------------------------------------------------------|--------|-----------|-------|------------------|----|----------------------------|--------|-----------|-------|-----------------|
| 130 |                                                                    |        |           |       |                  |    |                            |        |           |       |                 |
| 131 |                                                                    |        |           |       |                  |    |                            |        |           |       |                 |
| 132 |                                                                    |        |           |       |                  |    |                            |        |           |       |                 |
| 133 | FRUIT (fixed effects)                                              |        |           |       |                  |    | VEGETABLES (fixed effects) |        |           |       |                 |
| 134 |                                                                    | Coef.  | Robust SE | p     | 95% CI           |    |                            | Coef.  | Robust SE | p     | 95% CI          |
| 135 | Commute time (hours)                                               | -0.001 | 0.002     | 0.784 | (-0.004, 0.003)  |    | Commute time (hours)       | -0.003 | 0.002     | 0.186 | (-0.008, 0.002) |
| 136 | Age (Years)                                                        | 0.002  | 0.002     | 0.313 | (-0.002, 0.005)  |    | Age (Years)                | 0.007  | 0.002     | 0.000 | (0.003, 0.011)  |
| 137 | Sex (Female)                                                       | 0.000  | .         | .     | (., .)           |    | Sex (Female)               | 0.000  | .         | .     | (., .)          |
| 138 | Household composition (Single parent)                              | 0.035  | 0.061     | 0.572 | (-0.085, 0.155)  |    | Household composition (S   | 0.242  | 0.086     | 0.005 | (0.074, 0.410)  |
| 139 | Household composition (Multi-person without children)              | -0.071 | 0.026     | 0.007 | (-0.123, -0.020) |    | Household composition (N   | 0.116  | 0.034     | 0.001 | (0.049, 0.183)  |
| 140 | Household composition (Multi-person with children)                 | -0.044 | 0.029     | 0.135 | (-0.101, 0.014)  |    | Household composition (N   | 0.205  | 0.037     | 0.000 | (0.132, 0.277)  |
| 141 | Neighbourhood SES Index of Advantage/Disadvantage (2nd decile)     | -0.038 | 0.050     | 0.441 | (-0.136, 0.059)  |    | Neighbourhood SES Index    | 0.043  | 0.063     | 0.500 | (-0.081, 0.167) |
| 142 | Neighbourhood SES Index of Advantage/Disadvantage (3rd decile)     | -0.024 | 0.049     | 0.628 | (-0.119, 0.072)  |    | Neighbourhood SES Index    | -0.031 | 0.061     | 0.608 | (-0.151, 0.088) |
| 143 | Neighbourhood SES Index of Advantage/Disadvantage (4th decile)     | -0.042 | 0.049     | 0.394 | (-0.138, 0.054)  |    | Neighbourhood SES Index    | -0.000 | 0.062     | 0.995 | (-0.121, 0.120) |
| 144 | Neighbourhood SES Index of Advantage/Disadvantage (5th decile)     | -0.013 | 0.049     | 0.796 | (-0.108, 0.083)  |    | Neighbourhood SES Index    | 0.063  | 0.063     | 0.319 | (-0.061, 0.186) |
| 145 | Neighbourhood SES Index of Advantage/Disadvantage (6th decile)     | -0.010 | 0.049     | 0.839 | (-0.106, 0.086)  |    | Neighbourhood SES Index    | 0.039  | 0.062     | 0.527 | (-0.082, 0.161) |
| 146 | Neighbourhood SES Index of Advantage/Disadvantage (7th decile)     | 0.028  | 0.052     | 0.583 | (-0.073, 0.129)  |    | Neighbourhood SES Index    | 0.044  | 0.063     | 0.485 | (-0.080, 0.168) |
| 147 | Neighbourhood SES Index of Advantage/Disadvantage (8th decile)     | 0.012  | 0.051     | 0.813 | (-0.087, 0.111)  |    | Neighbourhood SES Index    | 0.075  | 0.064     | 0.242 | (-0.051, 0.200) |
| 148 | Neighbourhood SES Index of Advantage/Disadvantage (9th decile)     | -0.027 | 0.051     | 0.596 | (-0.126, 0.073)  |    | Neighbourhood SES Index    | -0.000 | 0.066     | 0.999 | (-0.130, 0.129) |
| 149 | Neighbourhood SES Index of Advantage/Disadvantage (Highest decile) | 0.010  | 0.055     | 0.863 | (-0.099, 0.118)  |    | Neighbourhood SES Index    | 0.020  | 0.072     | 0.780 | (-0.121, 0.161) |
| 150 | Remoteness (Inner Regional Australia)                              | -0.026 | 0.040     | 0.524 | (-0.104, 0.053)  |    | Remoteness (Inner Region   | 0.067  | 0.048     | 0.169 | (-0.028, 0.162) |
| 151 | Remoteness (Outer Regional Australia)                              | -0.038 | 0.055     | 0.493 | (-0.145, 0.070)  |    | Remoteness (Outer Region   | 0.196  | 0.072     | 0.007 | (0.054, 0.338)  |
| 152 | Remoteness (Remote or very remote Australia)                       | 0.102  | 0.095     | 0.282 | (-0.084, 0.289)  |    | Remoteness (Remote or ve   | 0.144  | 0.125     | 0.251 | (-0.102, 0.389) |
| 153 | Schedule (Other)                                                   | 0.022  | 0.019     | 0.251 | (-0.016, 0.060)  |    | Schedule (Other)           | -0.023 | 0.024     | 0.343 | (-0.070, 0.024) |
| 154 | Tertiary education                                                 | -0.050 | 0.043     | 0.242 | (-0.133, 0.034)  |    | Tertiary education         | 0.176  | 0.054     | 0.001 | (0.070, 0.282)  |
| 155 |                                                                    |        |           |       |                  |    |                            |        |           |       |                 |
| 156 |                                                                    |        |           |       |                  |    |                            |        |           |       |                 |
| 157 |                                                                    |        |           |       |                  |    |                            |        |           |       |                 |
| 158 |                                                                    |        |           |       |                  |    |                            |        |           |       |                 |
| 159 |                                                                    |        |           |       |                  |    |                            |        |           |       |                 |
| 160 |                                                                    |        |           |       |                  |    |                            |        |           |       |                 |
| 161 |                                                                    |        |           |       |                  |    |                            |        |           |       |                 |
| 162 |                                                                    |        |           |       |                  |    |                            |        |           |       |                 |
| 163 |                                                                    |        |           |       |                  |    |                            |        |           |       |                 |



|     | A                                                                  | B     | C         | D     | E              | F                       | G                            | H     | I         | J              | K      | L |
|-----|--------------------------------------------------------------------|-------|-----------|-------|----------------|-------------------------|------------------------------|-------|-----------|----------------|--------|---|
| 164 |                                                                    |       |           |       |                |                         |                              |       |           |                |        |   |
| 165 |                                                                    |       |           |       |                |                         |                              |       |           |                |        |   |
| 166 | <b>COMBINED WORK HOURS AND COMMUTE TIME ANALYSIS</b>               |       |           |       |                |                         |                              |       |           |                |        |   |
| 167 | <b>BREAKFAST (fixed effects)</b>                                   |       |           |       |                |                         | <b>LUNCH (fixed effects)</b> |       |           |                |        |   |
| 168 |                                                                    | IRR   | Robust SE | p     | 95% CI         |                         |                              | IRR   | Robust SE | p              | 95% CI |   |
| 169 | Combined work hours and commute time                               | 1.010 | 0.001     | 0.000 | (1.007, 1.013) | Combined work hours a   | 1.006                        | 0.001 | 0.000     | (1.004, 1.007) |        |   |
| 170 | Age (Years)                                                        | 1.001 | 0.004     | 0.847 | (0.993, 1.009) | Age (Years)             | 0.978                        | 0.002 | 0.000     | (0.975, 0.981) |        |   |
| 171 | Sex (Female)                                                       | 1.000 | .         | .     | (. , .)        | Sex (Female)            | 1.000                        | .     | .         | (. , .)        |        |   |
| 172 | Household composition (Single parent)                              | 0.623 | 0.118     | 0.013 | (0.430, 0.904) | Household composition   | 0.931                        | 0.062 | 0.284     | (0.816, 1.061) |        |   |
| 173 | Household composition (Multi-person without children)              | 0.830 | 0.048     | 0.001 | (0.742, 0.929) | Household composition   | 0.881                        | 0.022 | 0.000     | (0.839, 0.925) |        |   |
| 174 | Household composition (Multi-person with children)                 | 0.679 | 0.047     | 0.000 | (0.593, 0.777) | Household composition   | 0.853                        | 0.024 | 0.000     | (0.807, 0.902) |        |   |
| 175 | Neighbourhood SES Index of Advantage/Disadvantage (2nd decile)     | 0.944 | 0.146     | 0.711 | (0.698, 1.278) | Neighbourhood SES Inde  | 1.051                        | 0.061 | 0.393     | (0.937, 1.179) |        |   |
| 176 | Neighbourhood SES Index of Advantage/Disadvantage (3rd decile)     | 1.015 | 0.148     | 0.918 | (0.763, 1.351) | Neighbourhood SES Inde  | 1.004                        | 0.054 | 0.934     | (0.904, 1.116) |        |   |
| 177 | Neighbourhood SES Index of Advantage/Disadvantage (4th decile)     | 0.964 | 0.141     | 0.803 | (0.724, 1.284) | Neighbourhood SES Inde  | 1.061                        | 0.057 | 0.273     | (0.954, 1.180) |        |   |
| 178 | Neighbourhood SES Index of Advantage/Disadvantage (5th decile)     | 0.897 | 0.127     | 0.445 | (0.679, 1.185) | Neighbourhood SES Inde  | 1.000                        | 0.055 | 0.996     | (0.898, 1.114) |        |   |
| 179 | Neighbourhood SES Index of Advantage/Disadvantage (6th decile)     | 0.855 | 0.125     | 0.285 | (0.641, 1.139) | Neighbourhood SES Inde  | 1.004                        | 0.055 | 0.941     | (0.902, 1.117) |        |   |
| 180 | Neighbourhood SES Index of Advantage/Disadvantage (7th decile)     | 0.858 | 0.120     | 0.271 | (0.652, 1.128) | Neighbourhood SES Inde  | 0.964                        | 0.052 | 0.497     | (0.868, 1.071) |        |   |
| 181 | Neighbourhood SES Index of Advantage/Disadvantage (8th decile)     | 0.861 | 0.124     | 0.297 | (0.649, 1.141) | Neighbourhood SES Inde  | 0.982                        | 0.052 | 0.737     | (0.885, 1.091) |        |   |
| 182 | Neighbourhood SES Index of Advantage/Disadvantage (9th decile)     | 0.903 | 0.128     | 0.471 | (0.685, 1.191) | Neighbourhood SES Inde  | 1.003                        | 0.055 | 0.957     | (0.901, 1.116) |        |   |
| 183 | Neighbourhood SES Index of Advantage/Disadvantage (Highest decile) | 0.947 | 0.137     | 0.705 | (0.713, 1.257) | Neighbourhood SES Inde  | 1.034                        | 0.057 | 0.541     | (0.928, 1.153) |        |   |
| 184 | Remoteness (Inner Regional Australia)                              | 0.942 | 0.100     | 0.575 | (0.766, 1.159) | Remoteness (Inner Regio | 0.947                        | 0.038 | 0.176     | (0.875, 1.025) |        |   |
| 185 | Remoteness (Outer Regional Australia)                              | 0.931 | 0.108     | 0.536 | (0.741, 1.169) | Remoteness (Outer Regio | 0.841                        | 0.052 | 0.005     | (0.745, 0.950) |        |   |
| 186 | Remoteness (Remote or very remote Australia)                       | 0.709 | 0.178     | 0.170 | (0.434, 1.158) | Remoteness (Remote or   | 0.916                        | 0.113 | 0.478     | (0.719, 1.167) |        |   |
| 187 | Schedule (Other)                                                   | 0.884 | 0.042     | 0.010 | (0.805, 0.970) | Schedule (Other)        | 0.963                        | 0.020 | 0.068     | (0.925, 1.003) |        |   |
| 188 | Tertiary education                                                 | 1.050 | 0.096     | 0.592 | (0.878, 1.257) | Tertiary education      | 0.856                        | 0.036 | 0.000     | (0.787, 0.930) |        |   |
| 189 |                                                                    |       |           |       |                |                         |                              |       |           |                |        |   |

|     | M                                                              | N     | O         | P     | Q              | R                       | S                             | T     | U         | V     | W              | X |
|-----|----------------------------------------------------------------|-------|-----------|-------|----------------|-------------------------|-------------------------------|-------|-----------|-------|----------------|---|
| 164 |                                                                |       |           |       |                |                         |                               |       |           |       |                |   |
| 165 |                                                                |       |           |       |                |                         |                               |       |           |       |                |   |
| 166 |                                                                |       |           |       |                |                         |                               |       |           |       |                |   |
| 167 | DINNER (fixed effects)                                         |       |           |       |                |                         | EAT OUT TOTAL (fixed effects) |       |           |       |                |   |
| 168 |                                                                | IRR   | Robust SE | p     | 95% CI         |                         |                               | IRR   | Robust SE | p     | 95% CI         |   |
| 169 | Combined work hours and commute time                           | 1.006 | 0.001     | 0.000 | (1.004, 1.007) | Combined work hours ar  |                               | 1.006 | 0.000     | 0.000 | (1.005, 1.007) |   |
| 170 | Age (Years)                                                    | 0.990 | 0.001     | 0.000 | (0.987, 0.993) | Age (Years)             |                               | 0.985 | 0.001     | 0.000 | (0.983, 0.988) |   |
| 171 | Sex (Female)                                                   | 1.000 | .         | .     | (., .)         | Sex (Female)            |                               | 1.000 | .         | .     | (., .)         |   |
| 172 | Household composition (Single parent)                          | 0.783 | 0.047     | 0.000 | (0.696, 0.882) | Household composition   |                               | 0.834 | 0.042     | 0.000 | (0.755, 0.921) |   |
| 173 | Household composition (Multi-person without children)          | 0.826 | 0.020     | 0.000 | (0.788, 0.867) | Household composition   |                               | 0.854 | 0.017     | 0.000 | (0.821, 0.889) |   |
| 174 | Household composition (Multi-person with children)             | 0.712 | 0.020     | 0.000 | (0.674, 0.752) | Household composition   |                               | 0.778 | 0.018     | 0.000 | (0.743, 0.815) |   |
| 175 | Neighbourhood SES Index of Advantage/Disadvantage (2nd decile) | 1.019 | 0.059     | 0.739 | (0.910, 1.142) | Neighbourhood SES Inde  |                               | 1.020 | 0.054     | 0.709 | (0.920, 1.131) |   |
| 176 | Neighbourhood SES Index of Advantage/Disadvantage (3rd decile) | 1.070 | 0.058     | 0.210 | (0.962, 1.191) | Neighbourhood SES Inde  |                               | 1.023 | 0.048     | 0.623 | (0.934, 1.121) |   |
| 177 | Neighbourhood SES Index of Advantage/Disadvantage (4th decile) | 1.019 | 0.056     | 0.737 | (0.915, 1.134) | Neighbourhood SES Inde  |                               | 1.027 | 0.048     | 0.578 | (0.936, 1.126) |   |
| 178 | Neighbourhood SES Index of Advantage/Disadvantage (5th decile) | 0.984 | 0.052     | 0.763 | (0.887, 1.092) | Neighbourhood SES Inde  |                               | 0.974 | 0.046     | 0.582 | (0.889, 1.068) |   |
| 179 | Neighbourhood SES Index of Advantage/Disadvantage (6th decile) | 1.036 | 0.054     | 0.498 | (0.936, 1.147) | Neighbourhood SES Inde  |                               | 0.989 | 0.045     | 0.818 | (0.904, 1.083) |   |
| 180 | Neighbourhood SES Index of Advantage/Disadvantage (7th decile) | 1.012 | 0.054     | 0.816 | (0.913, 1.123) | Neighbourhood SES Inde  |                               | 0.960 | 0.044     | 0.377 | (0.878, 1.051) |   |
| 181 | Neighbourhood SES Index of Advantage/Disadvantage (8th decile) | 1.045 | 0.055     | 0.409 | (0.942, 1.159) | Neighbourhood SES Inde  |                               | 0.981 | 0.045     | 0.673 | (0.896, 1.073) |   |
| 182 | Neighbourhood SES Index of Advantage/Disadvantage (9th decile) | 1.052 | 0.058     | 0.359 | (0.944, 1.171) | Neighbourhood SES Inde  |                               | 1.001 | 0.047     | 0.976 | (0.914, 1.098) |   |
| 183 | Neighbourhood SES Index of Advantage/Disadvantage (Highest de  | 1.114 | 0.061     | 0.048 | (1.001, 1.240) | Neighbourhood SES Inde  |                               | 1.044 | 0.050     | 0.370 | (0.951, 1.146) |   |
| 184 | Remoteness (Inner Regional Australia)                          | 0.886 | 0.036     | 0.003 | (0.818, 0.960) | Remoteness (Inner Regio |                               | 0.925 | 0.032     | 0.023 | (0.864, 0.989) |   |
| 185 | Remoteness (Outer Regional Australia)                          | 0.885 | 0.048     | 0.025 | (0.796, 0.985) | Remoteness (Outer Regio |                               | 0.870 | 0.040     | 0.003 | (0.795, 0.953) |   |
| 186 | Remoteness (Remote or very remote Australia)                   | 0.739 | 0.079     | 0.005 | (0.599, 0.912) | Remoteness (Remote or v |                               | 0.824 | 0.084     | 0.058 | (0.674, 1.007) |   |
| 187 | Schedule (Other)                                               | 1.057 | 0.021     | 0.005 | (1.017, 1.098) | Schedule (Other)        |                               | 0.985 | 0.016     | 0.353 | (0.953, 1.017) |   |
| 188 | Tertiary education                                             | 1.091 | 0.045     | 0.035 | (1.006, 1.184) | Tertiary education      |                               | 0.957 | 0.033     | 0.202 | (0.895, 1.024) |   |
| 189 |                                                                |       |           |       |                |                         |                               |       |           |       |                |   |

|     | Y                                                                                                                   | Z      | AA        | AB    | AC               | AD                         | AE                       | AF     | AG        | AH    | AI              |
|-----|---------------------------------------------------------------------------------------------------------------------|--------|-----------|-------|------------------|----------------------------|--------------------------|--------|-----------|-------|-----------------|
| 164 |                                                                                                                     |        |           |       |                  |                            |                          |        |           |       |                 |
| 165 |                                                                                                                     |        |           |       |                  |                            |                          |        |           |       |                 |
| 166 |                                                                                                                     |        |           |       |                  |                            |                          |        |           |       |                 |
| 167 | FRUIT (fixed effects)                                                                                               |        |           |       |                  | VEGETABLES (fixed effects) |                          |        |           |       |                 |
| 168 |                                                                                                                     | Coef.  | Robust SE | p     | 95% CI           |                            |                          | Coef.  | Robust SE | p     | 95% CI          |
| 169 | Combined work hours and commute time                                                                                | -0.000 | 0.001     | 0.899 | (-0.001, 0.001)  |                            | Combined work hours and  | -0.000 | 0.001     | 0.802 | (-0.002, 0.001) |
| 170 | Age (Years)                                                                                                         | 0.001  | 0.002     | 0.362 | (-0.002, 0.005)  |                            | Age (Years)              | 0.007  | 0.002     | 0.001 | (0.003, 0.010)  |
| 171 | Sex (Female)                                                                                                        | 0.000  | .         | .     | (., .)           |                            | Sex (Female)             | 0.000  | .         | .     | (., .)          |
| 172 | Household composition (Single parent)                                                                               | 0.032  | 0.062     | 0.598 | (-0.088, 0.153)  |                            | Household composition (S | 0.239  | 0.086     | 0.005 | (0.070, 0.407)  |
| 173 | Household composition (Multi-person without children)                                                               | -0.071 | 0.026     | 0.007 | (-0.123, -0.020) |                            | Household composition (N | 0.116  | 0.034     | 0.001 | (0.049, 0.183)  |
| 174 | Household composition (Multi-person with children)                                                                  | -0.044 | 0.029     | 0.132 | (-0.101, 0.013)  |                            | Household composition (N | 0.205  | 0.037     | 0.000 | (0.132, 0.277)  |
| 175 | Neighbourhood SES Index of Advantage/Disadvantage (2nd decile)                                                      | -0.035 | 0.050     | 0.476 | (-0.133, 0.062)  |                            | Neighbourhood SES Index  | 0.045  | 0.064     | 0.478 | (-0.079, 0.170) |
| 176 | Neighbourhood SES Index of Advantage/Disadvantage (3rd decile)                                                      | -0.023 | 0.049     | 0.640 | (-0.118, 0.073)  |                            | Neighbourhood SES Index  | -0.033 | 0.061     | 0.589 | (-0.153, 0.087) |
| 177 | Neighbourhood SES Index of Advantage/Disadvantage (4th decile)                                                      | -0.041 | 0.049     | 0.401 | (-0.138, 0.055)  |                            | Neighbourhood SES Index  | -0.009 | 0.062     | 0.889 | (-0.130, 0.112) |
| 178 | Neighbourhood SES Index of Advantage/Disadvantage (5th decile)                                                      | -0.011 | 0.049     | 0.816 | (-0.107, 0.084)  |                            | Neighbourhood SES Index  | 0.061  | 0.063     | 0.332 | (-0.063, 0.185) |
| 179 | Neighbourhood SES Index of Advantage/Disadvantage (6th decile)                                                      | -0.008 | 0.049     | 0.864 | (-0.105, 0.088)  |                            | Neighbourhood SES Index  | 0.041  | 0.062     | 0.513 | (-0.081, 0.163) |
| 180 | Neighbourhood SES Index of Advantage/Disadvantage (7th decile)                                                      | 0.030  | 0.052     | 0.565 | (-0.072, 0.131)  |                            | Neighbourhood SES Index  | 0.043  | 0.064     | 0.496 | (-0.081, 0.168) |
| 181 | Neighbourhood SES Index of Advantage/Disadvantage (8th decile)                                                      | 0.013  | 0.051     | 0.793 | (-0.086, 0.113)  |                            | Neighbourhood SES Index  | 0.075  | 0.064     | 0.241 | (-0.051, 0.202) |
| 182 | Neighbourhood SES Index of Advantage/Disadvantage (9th decile)                                                      | -0.024 | 0.051     | 0.634 | (-0.124, 0.075)  |                            | Neighbourhood SES Index  | 0.001  | 0.066     | 0.991 | (-0.129, 0.131) |
| 183 | Neighbourhood SES Index of Advantage/Disadvantage (Highest decile)                                                  | 0.012  | 0.056     | 0.833 | (-0.097, 0.121)  |                            | Neighbourhood SES Index  | 0.022  | 0.072     | 0.758 | (-0.120, 0.164) |
| 184 | Remoteness (Inner Regional Australia)                                                                               | -0.025 | 0.040     | 0.525 | (-0.104, 0.053)  |                            | Remoteness (Inner Region | 0.077  | 0.048     | 0.110 | (-0.017, 0.171) |
| 185 | Remoteness (Outer Regional Australia)                                                                               | -0.037 | 0.055     | 0.505 | (-0.144, 0.071)  |                            | Remoteness (Outer Region | 0.211  | 0.072     | 0.004 | (0.069, 0.353)  |
| 186 | Remoteness (Remote or very remote Australia)                                                                        | 0.103  | 0.095     | 0.279 | (-0.083, 0.289)  |                            | Remoteness (Remote or ve | 0.153  | 0.125     | 0.220 | (-0.092, 0.398) |
| 187 | Schedule (Other)                                                                                                    | 0.022  | 0.019     | 0.251 | (-0.016, 0.060)  |                            | Schedule (Other)         | -0.021 | 0.024     | 0.384 | (-0.068, 0.026) |
| 188 | Tertiary education                                                                                                  | -0.048 | 0.043     | 0.268 | (-0.133, 0.037)  |                            | Tertiary education       | 0.178  | 0.055     | 0.001 | (0.070, 0.286)  |
| 189 | <b>Note: IRR: incidence rate ratio, Coef.: coefficient, SE: standard error, p: p-value, CI: confidence interval</b> |        |           |       |                  |                            |                          |        |           |       |                 |
